# Supplementary material for: ELK1 Uses Different DNA Binding Modes to Regulate Functionally Distinct Classes of Target Genes
Source: PubMed Central journal article supplement (PMC3349735; doi:10.1371/journal.pgen.1002694), 2012-05-10
Supplement: pgen.1002694.s005.pdf [file pgen.1002694.s005.pdf]

### Biological Process

| Term Name                   | Binom Raw P-Value | Binom Fold Enrichment | Hyper Raw P-Value | Hyper Fold Enrichment |
|-----------------------------|-------------------|-----------------------|-------------------|-----------------------|
| <a href="#">translation</a> | 1.5192e-8         | 3.0673                | 3.8162e-5         | 2.1268                |

### Cellular Component

| Term Name                                  | Binom Raw P-Value | Binom Fold Enrichment | Hyper Raw P-Value | Hyper Fold Enrichment |
|--------------------------------------------|-------------------|-----------------------|-------------------|-----------------------|
| <a href="#">ribosomal subunit</a>          | 1.6884e-7         | 4.5653                | 9.7923e-5         | 2.8403                |
| <a href="#">ribonucleoprotein complex</a>  | 4.4524e-7         | 2.2713                | 1.0783e-4         | 1.7967                |
| <a href="#">cytosolic part</a>             | 1.6981e-5         | 3.1388                | 7.9492e-5         | 2.6972                |
| <a href="#">exon-exon junction complex</a> | 5.4757e-5         | 42.6435               | 3.7562e-4         | 16.2897               |
| <a href="#">nuclear body</a>               | 2.0226e-4         | 2.4510                | 4.2781e-4         | 2.2580                |
| → <a href="#">actin cytoskeleton</a>       | 3.4671e-4         | 2.0246                | 1.1630e-4         | 2.1208                |
| <a href="#">nuclear speck</a>              | 4.4416e-4         | 2.7863                | 1.2437e-3         | 2.5340                |
| <a href="#">mediator complex</a>           | 1.1112e-3         | 4.5006                | 5.2378e-4         | 4.7512                |

### MSigDB Canonical Pathway

| Term Name                                                               | Binom Raw P-Value | Binom Fold Enrichment | Hyper Raw P-Value | Hyper Fold Enrichment |
|-------------------------------------------------------------------------|-------------------|-----------------------|-------------------|-----------------------|
| <a href="#">Genes involved in Metabolism of proteins</a>                | 2.4391e-9         | 4.1320                | 2.3358e-5         | 2.5023                |
| <a href="#">Genes involved in Gene Expression</a>                       | 3.7351e-9         | 2.7267                | 2.9901e-7         | 2.2572                |
| <a href="#">Spliceosome</a>                                             | 6.0691e-8         | 4.8983                | 2.0692e-5         | 3.0784                |
| → <a href="#">Focal adhesion</a>                                        | 1.3132e-4         | 2.2221                | 1.5808e-5         | 2.6195                |
| <a href="#">JNK MAPK Pathway</a>                                        | 4.3699e-4         | 3.7484                | 2.7862e-4         | 4.5725                |
| → <a href="#">Genes related to regulation of the actin cytoskeleton</a> | 5.4008e-4         | 5.1009                | 1.8704e-4         | 4.8266                |

## Supplementary Figure S5
