# Supplementary material for: ELK1 Uses Different DNA Binding Modes to Regulate Functionally Distinct Classes of Target Genes
Source: PubMed Central journal article supplement (PMC3349735; doi:10.1371/journal.pgen.1002694), 2012-05-10
Supplement: pgen.1002694.s012.pdf [file pgen.1002694.s012.pdf]

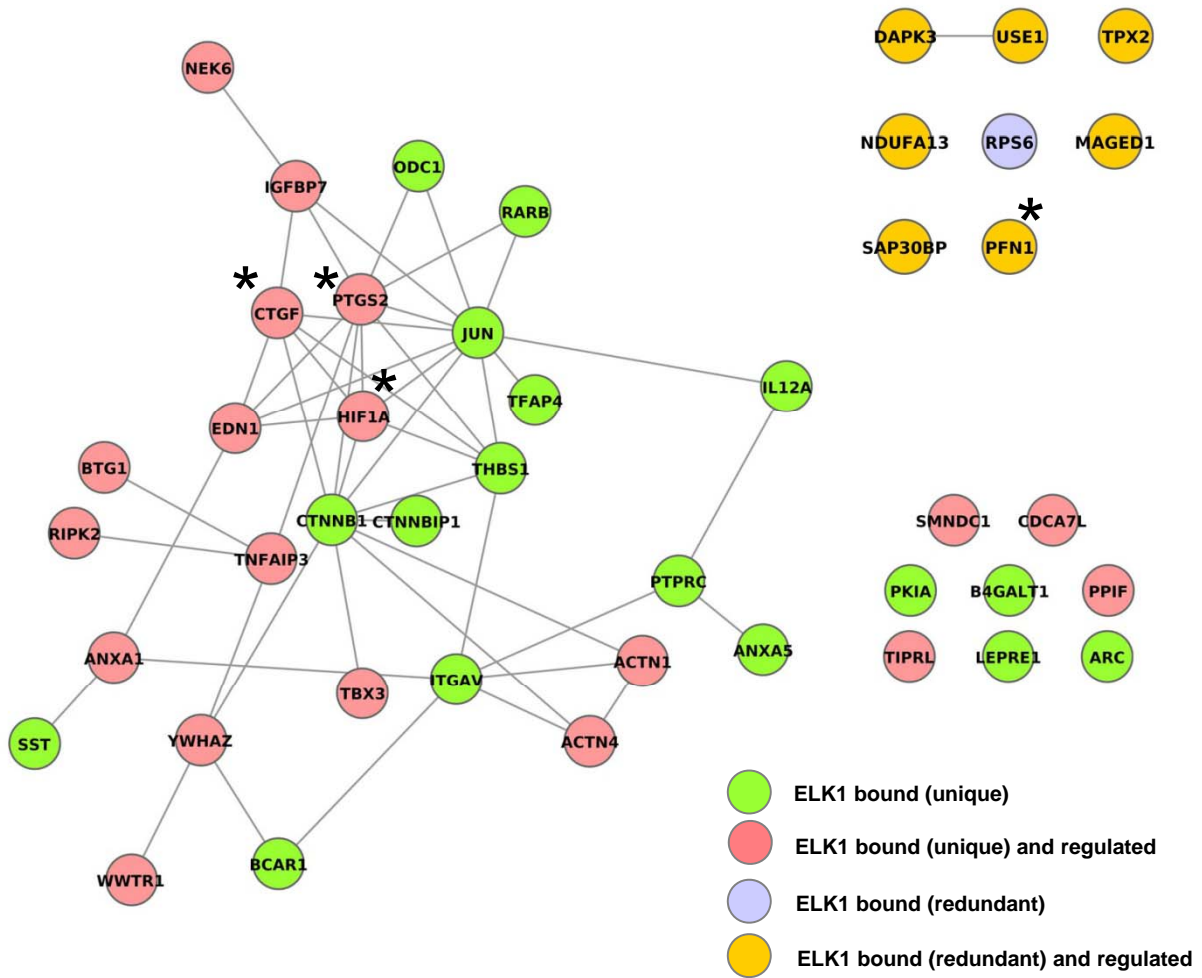

Supplementary Figure S12
