# Supplementary material for: ELK1 Uses Different DNA Binding Modes to Regulate Functionally Distinct Classes of Target Genes
Source: PubMed Central journal article supplement (PMC3349735; doi:10.1371/journal.pgen.1002694), 2012-05-10
Supplement: pgen.1002694.s021.pdf [file pgen.1002694.s021.pdf]

## A. Oligonucleotide primers used in ChIP qPCR.

| ASSOCIATED GENE       | ADS NUMBER   | SEQUENCE                                       | REGION AMPLIFIED (Mar. 2006 (hg18) assembly) | PCR PRODUCT SIZE (bp) |
|-----------------------|--------------|------------------------------------------------|----------------------------------------------|-----------------------|
| WNK1                  | 3111<br>3112 | GCATGCCCGATTATTCTCTC<br>GCTCCTGGTTCTGCAGGTAG   | chr12:703884-704102                          | 219                   |
| CAP1                  | 3113<br>3114 | CAAGGAGTACGGAAGCGAAG<br>TCGGTGTGTTCTGTGACCAT   | chr1:40278013-40278287                       | 275                   |
| ITGAV                 | 3115<br>3116 | ATTCCCAGGAGCCTCTCTTT<br>CAGCCTGGCTTCCCTAAGTC   | chr2:187148338-187148506                     | 169                   |
| ACTR3                 | 3117<br>3118 | TTCGACTCCTGGTCATTTC<br>CCAAGCACCGGTAATTCAGT    | chr2:114364948-114365220                     | 273                   |
| FOXP4                 | 3119<br>3120 | GCACAGATGACGAGGACAGA<br>CCTTCTAGGCGCATTCACTC   | chr6:41612595-41612890                       | 296                   |
| DDX27                 | 3121<br>3122 | ATACTGCCACCGTTTTGAGG<br>CTCGCCTATGGTCCGATTA    | chr20:47269136-47269431                      | 296                   |
| FLNA                  | 3123<br>3124 | ACCTCCCCTCTCCAGAATGT<br>TAGACACCCAGGGCTACAGG   | chrX:153254256-153254448                     | 193                   |
| ANXA3                 | 3125<br>3126 | TTTGCATATTGAGGGTTGGA<br>AGGGTCTTGCTGTCAAGTCT   | chr4:79692600-79692886                       | 287                   |
| RFC4                  | 3127<br>3128 | AAGGACGAGATGGTCTCGAA<br>CCAGTTCTGCCTGAAAGTCC   | chr3:188006839-188007109                     | 271                   |
| SDCBP2                | 3129<br>3130 | ACAAGCCACAACTCCATCC<br>TGCGCTCTAGAAGTTGCTGA    | chr20:1253748-1254001                        | 254                   |
| PAPLN                 | 3131<br>3132 | TGGAGACACTGCTCCTGTCA<br>TGCCCCGATTCTGAATTTAT   | chr14:72847960-72848083                      | 124                   |
| BCAR1                 | 3133<br>3134 | GCTTTGGGGCTGAAAACTA<br>GCAGCTCTGTGGTGTGTAGG    | chr16:73836378-73836666                      | 289                   |
| CAMKMT                | 3135<br>3136 | TTGCTCTCTCAGCGTTTTTG<br>GTCAGGTGAAAGGGCTGACT   | chr2:44827816-44828081                       | 266                   |
| SLC13A4               | 3137<br>3138 | TCCAAATGGAACATTGCTGA<br>GCCCATCAGGTAAAACAGGA   | chr7:135042852-135043135                     | 284                   |
| PSMB4                 | 3139<br>3140 | TCGCCACCTAGGATTACTGC<br>ACGGAATGCGGTAAAACACTGT | chr1:149638537-149638763                     | 227                   |
| ATF7IP                | 3141<br>3142 | GGGAAGAACAGCCTGGTGTA<br>TGCTGGATTGTTCTGTCGTC   | chr12:14318145-14318388                      | 244                   |
| chip_ <i>INT3</i> SRF | 1273<br>1274 | GCCACAGGGCAGTAGATGTT<br>TCAGGCCCAAGTATCCACTC   | chr6:43251941-43252121                       | 181                   |
| EGR2                  | 3343<br>3344 | GTTCCGTTTTCGCTCCTGTA<br>TTTCTTGGCAGCTCAAAACC   | chr10:64246622-64246805                      | 184                   |
| ABLIM2                | 2599<br>2600 | GGCTTGCTCAGAAACACTCC<br>ATCCTTCTGAGTCCCCACT    | chr4:8013205-8013391                         | 187                   |
| CPLX1                 | 2636<br>2637 | GAACAGAGCAGCGCATATCA<br>CTGGGTGACACCTGAGCTTC   | chr4:766403-766527                           | 125                   |

## B. Oligonucleotide primers used in RT-PCR

| GENE   | ADS NUMBER   | STRAND             | SEQUENCE                                             |
|--------|--------------|--------------------|------------------------------------------------------|
| ACTB   | 3371<br>3372 | FORWARD<br>REVERSE | TGACCCAGATCATGTTTGAG<br>CTTCATGAGGTAGTCAGTCAG        |
| ACTN1  | 3373<br>3374 | FORWARD<br>REVERSE | GCAGAGAAAGACATTCACGG<br>TCATCTTCACATTCCCATCCA        |
| CDH3   | 3375<br>3376 | FORWARD<br>REVERSE | GAAAGAAGCGGAAGATCAAGG<br>GATGTCATAGTCCTGGTCCTC       |
| CTGF   | 2335<br>2336 | FORWARD<br>REVERSE | AAGAGAACATTAAGAAGGGCA<br>GCGATTCAAAGATGTCATTGTC      |
| HIF1A  | 3377<br>3378 | FORWARD<br>REVERSE | CGTTGTGAGTGGTATTATTCAG<br>CAGGTTCTTCTTAAGTTTGTC      |
| IQGAP1 | 3379<br>3380 | FORWARD<br>REVERSE | AAGTCCTGAACATAATCTCACC<br>GTATTCACATCTCCTGATTCCA     |
| LIMA1  | 3381<br>3382 | FORWARD<br>REVERSE | ATTCTCCAAGTACCAGAAAGCA<br>TGCTCTGTGCCTAATCTCAG       |
| PFN1   | 3385<br>3386 | FORWARD<br>REVERSE | AGACTGACAAGACGCTAGTC<br>GACAGACGAGGTCAGTACTG         |
| PTGS2  | 3383<br>3384 | FORWARD<br>REVERSE | TGTGTTGACATCCAGATCAC<br>GGAAGGGCTCTAGTATAATAGG       |
| RBL2   | 2436<br>2437 | FORWARD<br>REVERSE | CTGAACTTATGATGGACAGAC<br>ACACTTCTATACACCTGGCTC       |
| EFR3A  | 3363<br>3364 | FORWARD<br>REVERSE | GGAGGACTACGAACTGAGAC<br>ACATCCGGTATTATTCTGATCCC      |
| ELK1   | 2113<br>2114 | FORWARD<br>REVERSE | GGTGGTGAATTC AAGCTGGT<br>ATTTGGCATGGTGGAGGTAA        |
| GABPA  | 2442<br>2443 | FORWARD<br>REVERSE | AATCTGCTACACCTACTACCA<br>CATTGTTTCCTGTTCTGTTCC       |
| SAP1   | 2276<br>2277 | FORWARD<br>REVERSE | TCGCAAGAACAAGCCTAACA<br>CTTCCCTCCATTCTCCACA          |
| KLHL28 | 3365<br>3366 | FORWARD<br>REVERSE | GTGGTGGGTGGACATAATGGAGTC<br>CGATTACAGCAGCACCAACTCCTG |
| MDM4   | 3367<br>3368 | FORWARD<br>REVERSE | CTTCTCCGTGAAAGACCCAAGC<br>ATACTGTGATCCTGTGCGAGAGC    |
| SCNM1  | 3369<br>3370 | FORWARD<br>REVERSE | AGGAGTCAGCAACTGTCTCAGC<br>CATCTGGGATCCATCCAGAGCTTC   |

**Table S5**
