# Supplementary material for: ELK1 Uses Different DNA Binding Modes to Regulate Functionally Distinct Classes of Target Genes
Source: PLOS journal article supplement (doi:10.1371/journal.pgen.1002694), 2012-05-10
Supplement: S11 (10.1371/journal.pgen.1002694.s011) [file journal.pgen.1002694.s011]

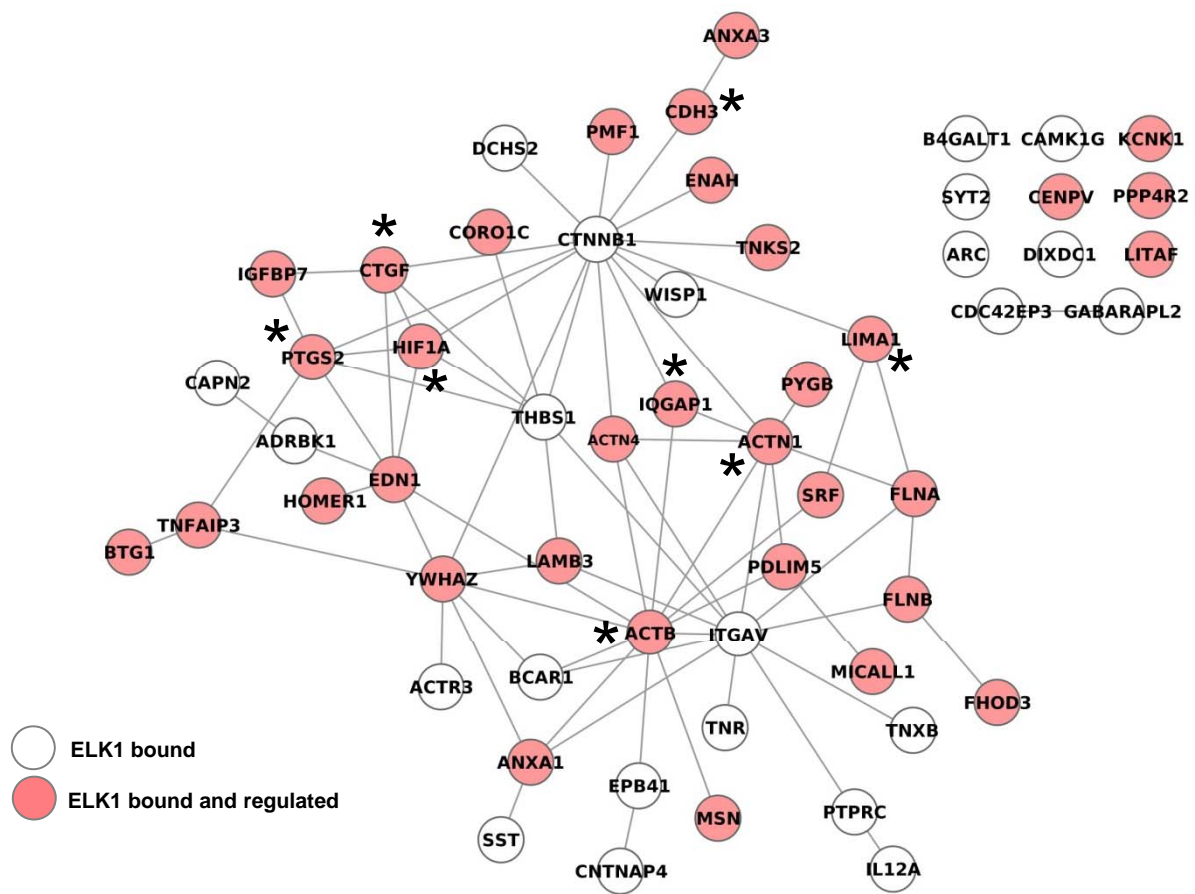

Supplementary Figure S11
