# Supplementary material for: ELK1 Uses Different DNA Binding Modes to Regulate Functionally Distinct Classes of Target Genes
Source: PLoS Genet. 2012 May 10;8(5):e1002694. doi: 10.1371/journal.pgen.1002694 (PMC3349735; doi:10.1371/journal.pgen.1002694)
Supplement: Table S2 — ChIP-seq analysis of ELK1 binding regions in MCF10A cells. Data are shown for (A) high confidence binding regions which have a FDR<10% and appear in two independent experiments and (B) lower confidence binding regions which have a FDR<10% but appear in only one experiment. Genomic coordinates, summits, tag numbers and significance values are shown for each region from the experiment (repeat 2) which gave peaks with more stringent P-values. (XLSX) [file pgen.1002694.s018.xlsx]

## Sheet: high confidence
rank	chr	start	end	ID	length	summit	tags	(-)log10Pval	FoldEn	FDR(%)		TSS	strand	RefSeq_ID	Gene_Name	distance	GABPA	SRF	ELK4	FC EvsG, t=0	FC EvsG, t=30	FC 30vs0, siGAPDH	FC 30vs0, siELK1
1	chr1	207637925	207639134	145	1210	791	265	2744.22	137.52	0		207668790	+	NM_001104548	LOC642587	-30074	0	1	1	0.609102	0.592646
2	chr12	703596	704627	323	1032	466	261	3100	229.34	0		732485	+	NM_018979	WNK1	-28423	0	1	0		1.44493
3	chr1	39264632	39265595	33	964	413	198	2835.36	313.65	0		39264592	+	NM_004552	NDUFS5	453	0	1	1
4	chr8	103987426	103988314	1394	889	376	146	1672.31	149.97	0		103945573	-	NM_015878	AZIN1	42229	0	0	1	1.15627
5	chr5	139620983	139621809	1164	827	320	145	1527.66	118.65	0		139662873	-	NM_002622	PFDN1	-41570	0	0	1
6	chr17	40750181	40750933	614	753	269	141	1863.78	209.91	0		40750197	-	NM_003954	MAP3K14	253	0	1	1	0.835284
7	chr11	111354116	111355059	314	944	400	135	1648.82	179.63	0		111353242	+	NM_033425	DIXDC1	1274	0	1	0
8	chr5	137828247	137829438	1161	1192	470	127	1411.91	149.01	0		137829079	+	NM_001964	EGR1	-362	0	1	1	0.668923	1.3071	38.9008	76.0133
9	chr19	16156633	16157600	700	968	397	110	1376.95	203.77	0		16157234	+	NM_014077	FAM32A	-204	1	1	1
10	chr19	62592561	62593228	767	668	345	109	1534.33	208.3	0		62593029	+	NM_152909	ZNF548	-123	1	1	1
11	chr11	12167237	12168067	252	831	568	104	1216.17	136.88	0		12088713	+	NM_014632	MICAL2	79092	0	1	0
12	chr3	102887926	102888515	1016	590	382	98	1337.49	159.97	0		102888253	-	NM_000986	RPL24	55	1	1	1
13	chr6	126281781	126282254	1270	474	245	97	1129.42	81.34	0		126319553	+	NM_138571	HINT3	-37527	0	1	1	0.623545	0.596046
14	chr9	33155666	33156448	1430	783	276	96	1176.21	152.51	0		33157356	-	NM_001497	B4GALT1	-1414	0	1	1			2.49547	2.23771
15	chr3	9809031	9809871	972	841	452	93	1099.24	127.09	0		9809420	-	NM_006354	TADA3L	63	1	1	1	1.23744	1.31959
16	chr10	64245737	64247015	208	1279	433	90	906.8	85.41	0		64246132	-	NM_000399	EGR2	38	0	1	1	0.761177	0.657754	15.6076	13.487
17	chr6	132317296	132318242	1272	947	492	87	831.91	103.16	0		132314211	-	NM_001901	CTGF	3577	0	0	1	0.763958	0.626776	44.0866	36.1701
18	chr21	33674631	33675208	935	578	350	87	1200.31	158.49	0		33697071	+	NM_005534	IFNGR2	-22090	0	1	1	0.67625	0.641505
19	chr18	55518081	55519018	669	938	426	86	751.21	77.95	0		55515570	-	NM_133459	CCBE1	2937	0	0	0
20	chr17	16129823	16130651	584	829	388	84	1016.81	156.22	0		16197537	-	NM_181716	CENPV	-67326	0	1	1	0.837976	0.844031
21	chr12	48902262	48903253	354	992	485	76	738.48	105.06	0		48902755	-	NM_001113547	LIMA1	-8	0	1	1	0.66114	0.711826
22	chrX	13415134	13416069	1468	936	389	75	765.13	94.41	0		13497661	+	NM_015507	EGFL6	-82138	0	1	1
23	chr15	79976508	79977151	513	644	362	69	770.95	94.9	0		80125416	-	NM_032246	MEX3B	-148546	0	0	0
24	chr16	65102956	65103811	548	856	415	69	597.93	67.14	0		65141816	-	NM_004614	TK2	-38445	0	0	1	1.46516	1.49703
25	chr1	59017794	59018531	56	738	398	65	594.63	66.09	0		59022373	-	NM_002228	JUN	-4181	0	0	0			7.24148	7.05189
26	chr19	54860496	54861356	751	861	455	64	696.23	124.53	0		54860944	-	NM_001571	IRF3	7	0	1	1
27	chr8	42389384	42390047	1375	664	298	64	737.92	101.68	0		42368502	+	NM_005662	VDAC3	21180	0	0	0
28	chr8	146198857	146199383	1419	527	245	62	613.1	67.78	0		146199089	-	NR_023392	ZNF252	13	1	1	1
29	chr5	67765844	67766462	1141	619	175	61	622.76	78.44	0		67622250	+	NM_181504	PIK3R1	143769	0	1	1	1.4526	2.28648
30	chr1	231923447	231924034	167	588	418	59	312.64	21.35	0		231816372	+	NM_002245	KCNK1	107493	0	1	0	0.77062	0.797117
31	chr10	12352784	12353383	188	600	278	59	540.03	48.58	0		12278149	-	NM_014142	NUDT5	74913	0	0	0
32	chr2	55312102	55313301	805	1200	311	57	308.03	24.96	0		55312568	+	NM_001135592	RPS27A	-155	1	0	1
33	chr1	200813912	200814553	139	642	165	56	411.63	37.72	0		200879204	-	NM_001136504	SYT2	-65127	0	1	0
34	chr1	205144854	205145740	143	887	476	56	344.39	34.45	0		205137411	+	NM_006850	IL24	7919	0	0	0
35	chr3	170964431	170965257	1044	827	416	56	584.35	108.31	0		170965542	-	NR_001566	TERC	-695	0	1	1
36	chr5	78846054	78846455	1144	402	181	55	729.21	117.73	0		78845456	-	NM_004272	HOMER1	779	0	1	1	0.621557	0.682331
37	chr3	12857725	12858507	974	783	615	54	393.34	39.65	0		12858081	-	NM_000994	RPL32	259	1	1	1
38	chr8	134259215	134260011	1408	797	500	54	349.75	34.74	0		134272493	+	NM_003882	WISP1	-12778	0	0	0
39	chr6	12432259	12432791	1206	533	223	54	588.43	78.72	0		12398514	+	NM_001955	EDN1	33968	0	0	1	0.709934	0.626957	3.75442	2.8617
40	chr11	95615905	95616407	304	503	292	54	633.84	92.26	0		95715992	-	NM_032427	MAML2	-99795	0	1	1	0.737114	0.762242
41	chr5	41939613	41940327	1136	715	475	54	595.07	97.36	0		41940226	+	NM_175921	C5orf51	-138	1	1	1
42	chr18	47293908	47294636	667	729	233	53	476.21	63.91	0		46977688	-	NM_016626	MEX3C	316453	0	0	0	1.5156	1.48947
43	chr4	95592666	95593529	1092	864	325	53	537.51	90.56	0		95592060	+	NM_001011513	PDLIM5	931	0	0	1	1.14991
44	chr7	5537733	5538419	1295	687	489	53	523.91	69.48	0		5536758	-	NM_001101	ACTB	1464	0	1	1	0.667919	0.835362
45	chr8	117525975	117526712	1400	738	482	53	352.58	35.02	0		117837243	-	NM_003756	EIF3H	-310786	0	0	1
46	chr1	40277925	40278703	34	779	317	52	522.76	91.51	0		40278841	+	NM_006367	CAP1	-599	1	1	1
47	chr2	86522942	86523676	821	735	472	52	407.44	51.97	0		86521864	+	NM_018433	JMJD1A	1550	0	1	1
48	chr19	44276215	44276717	729	503	232	51	628.05	88.3	0		44266784	+	NM_001004318	FLJ16165	9663	0	0	0
49	chr1	171950395	171951482	120	1088	305	51	284.62	35.59	0		171950702	+	NM_014458	KLHL20	-2	1	1	1	0.799752
50	chr5	158622197	158623316	1179	1120	658	51	349.86	47.93	0		158622666	+	NM_145049	UBLCP1	189	1	0	1	1.23852
51	chr17	72595913	72596553	642	641	384	50	437.33	58.46	0		72596319	+	NR_027058	C17orf86	-22	1	0	1
52	chr1	148818578	148819189	83	612	171	50	511.35	77.55	0		148818760	-	NM_182763	MCL1	-11	1	1	1	1.56224		1.605	1.47886
53	chr10	112668448	112669240	234	793	244	50	514.3	88.3	0		112668684	-	NR_024143	NCRNA00081	8	1	0	1	2.25898	2.31468
54	chr22	23676305	23677317	949	1013	494	49	444.55	81.78	0		23665314	-	NM_001001663	TMEM211	11485	1	0	0
55	chr12	108385015	108385893	380	879	514	49	405.99	60.37	0		108399538	-	NM_031954	KCTD10	-14009	0	1	0
56	chr2	55600046	55600669	806	624	192	49	550.49	99.62	0		55600243	+	NM_080667	CCDC104	-5	1	0	1		1.17348
57	chr1	58965482	58966335	54	854	534	48	412.7	64.39	0		58938335	-	NM_001085487	MYSM1	27681	0	0	0	1.53978	1.23091
58	chrX	13662260	13662976	1469	717	495	47	448.59	72.63	0		13662752	+	NM_003611	OFD1	3	1	1	1
59	chr5	133477630	133478269	1158	640	476	47	447.76	66.17	0		133478300	+	NM_003202	TCF7	-194	0	1	0
60	chr19	45618444	45619008	733	565	317	46	525.48	88.3	0		45623772	-	NM_013376	SERTAD1	-5011	0	1	1	1.19563	1.23317	1.40138
61	chr14	61098157	61098985	450	829	382	45	346.76	53.38	0		61231871	+	NM_001530	HIF1A	-133332	0	0	1	0.492609	0.517565
62	chr1	184916061	184916644	131	584	305	44	416.77	58.54	0		184916182	-	NM_000963	PTGS2	184	0	0	1	0.724235	0.24045	10.8951	3.61722
63	chr22	25398312	25399396	950	1085	384	44	309.18	31.77	0		25383483	+	NR_003491	MIAT	15213	1	0	1
64	chr1	212521573	212522092	150	520	228	43	372.74	40.92	0		212521187	+	NM_020197	SMYD2	614	0	0	1	0.441766	0.468731
65	chr6	28237382	28237981	1221	600	169	42	446.47	71.39	0		28237529	+	NM_001145129	ZNF389	22	0	0	1
66	chr18	58585411	58585972	670	562	321	42	344.77	36.57	0		58533713	+	NM_194449	PHLPP	52019	0	0	0
67	chr21	39125115	39125925	940	811	450	41	387.5	63.4	0		39099718	+	NM_005239	ETS2	25847	0	0	1	1.22743	1.24614
68	chr12	11929166	11930029	336	864	388	41	276.41	42.67	0		12115144	+	NM_138723	BCL2L14	-185590	0	0	0
69	chr3	124143537	124144357	1022	821	405	41	360.03	70.39	0		124088049	+	NR_024618	LOC100129550	55893	0	0	0
70	chr2	190335492	190336250	858	759	260	41	380.36	56.94	0		190336169	-	NM_022353	OSGEPL1	-417	1	0	0
71	chr15	69361322	69362093	508	772	355	40	299.25	45.34	0		69421140	-	NM_001093733	LOC645296	-59463	0	0	0
72	chr2	6164849	6165375	773	527	220	40	398.43	62.7	0		6039560	+	NR_026833	LOC400940	125509	0	0	0
73	chr6	36517102	36517520	1240	419	180	40	469.16	63.04	0		36518521	+	NM_173562	KCTD20	-1239	1	0	1	0.673415	0.799991
74	chr11	64520942	64521635	280	694	227	39	292.8	39.4	0		64521093	-	NM_138456	BATF2	76	0	0	1
75	chr5	33348735	33349557	1133	823	392	38	298.18	53.55	0		33476654	+	NM_152295	TARS	-127527	0	0	1
76	chr16	46757337	46757902	545	566	278	37	322.7	45.03	0		46738182	-	NM_033226	ABCC12	19433	0	1	0
77	chr12	113922289	113922678	386	390	184	37	411.12	57.85	0		113606352	-	NM_016569	TBX3	316121	0	0	0	2.30759	2.021
78	chr6	30693076	30693911	1227	836	218	37	308.31	44.97	0		30693464	+	NM_014046	MRPS18B	-170	1	0	1	1.4926	1.75559
79	chr1	42995074	42995684	39	611	304	37	310.83	43.58	0		43005342	-	NM_022356	LEPRE1	-9964	0	0	1
80	chr11	94449365	94449740	303	376	206	36	391.73	54.12	0		94439703	+	NM_032102	SFRS2B	9868	0	1	0	0.482405	0.602308
81	chr17	4790921	4791742	571	822	374	36	321.14	61.13	0		4792570	-	NM_005022	PFN1	-1275	1	1	0	0.727518
82	chr14	23008481	23008903	431	423	171	36	406.85	71.17	0		23008737	+	NM_001042635	NGDN	-85	1	1	1		1.19436
83	chr13	73074390	73074926	410	537	282	36	275.52	31.67	0		73606067	-	NM_007249	KLF12	-531395	0	0	0		0.802447
84	chr2	24152448	24153054	787	607	409	36	367.55	70.19	0		24152818	-	NM_016047	SF3B14	39	1	1	1
85	chr2	10447865	10448568	777	704	342	36	322.41	52.79	0		10505904	-	NM_002539	ODC1	-57697	0	0	0
86	chr1	153212934	153213713	93	780	610	36	264.37	42.83	0		153213583	-	NM_001130041	SHC1	-39	1	0	1	0.646791	0.698101
87	chr3	58020232	58020837	1003	606	401	36	275.52	34.5	0		57969166	+	NM_001457	FLNB	51467	0	0	0	1.42466	1.65283
88	chr20	45454036	45454530	917	495	242	36	399.11	63.4	0		45418881	-	NM_012408	ZMYND8	35397	0	0	0	0.679515	0.774495
89	chr16	11585922	11586530	536	609	209	35	353.27	70.19	0		11587730	-	NM_004862	LITAF	-1599	0	0	0	0.693284	0.729358
90	chr3	188816601	188817159	1056	559	335	35	327.88	52.59	0		188870895	-	NM_001048	SST	-53959	0	1	1
91	chr5	148704773	148705354	1174	582	386	35	278.37	35.2	0		148705169	+	NM_152407	GRPEL2	-10	1	1	1
92	chr20	49484563	49485356	923	794	379	34	274.99	43.31	0		49592665	-	NM_012340	NFATC2	-107723	0	0	1
93	chr11	46678542	46679189	267	648	334	34	315.07	61.01	0		46678943	+	NM_024741	ZNF408	-67	1	1	1	1.223	1.16999
94	chr1	161272015	161272524	112	510	303	33	279.16	37.96	0		161305019	+	NM_001102445	RGS4	-32701	0	0	1
95	chrX	38091342	38091991	1473	650	240	33	293.7	49.88	0		38096679	+	NM_000531	OTC	-5097	0	0	0
96	chr16	67249689	67250505	550	817	509	33	270.07	48.8	0		67235651	+	NM_001793	CDH3	14547	0	0	0	0.764938	0.764138
97	chr10	16899330	16899863	193	534	166	32	327.41	64.1	0		16899459	-	NM_012425	RSU1	37	0	1	1	1.2324
98	chr19	58118032	58118474	758	443	277	32	341.86	70.19	0		58137659	-	NM_203307	ZNF321	-19350	0	0	1
99	chr3	73105008	73105693	1008	686	445	31	283.69	56.6	0		73128808	+	NM_174907	PPP4R2	-23355	0	0	0	1.16798
100	chr10	16518617	16519173	192	557	389	31	311.26	63.4	0		16518972	+	NM_001001484	PTER	34	0	1	1		1.22271
101	chr14	64218125	64218701	451	577	289	30	293.19	52.07	0		64240945	+	NM_015549	PLEKHG3	-22531	0	1	1
102	chr3	52296691	52297290	1001	600	396	30	288.18	47.55	0		52296875	+	NR_026699	GLYCTK	212	1	1	1		1.18831
103	chr8	143700314	143700882	1414	569	159	30	294.99	65.66	0		143692835	-	NM_015193	ARC	7638	0	1	0
104	chr19	42392920	42393566	723	647	411	29	265.79	45.28	0		42393291	-	NM_152279	ZNF585B	40	0	0	0
105	chr20	16851440	16852050	897	611	217	29	259.61	46.77	0		16677002	+	NM_020157	OTOR	174655	0	0	0
106	chr2	187148293	187148622	857	330	166	28	341.07	61.89	0		187163034	+	NM_002210	ITGAV	-14575	0	0	1
107	chr16	74588986	74589448	559	463	293	27	269.3	53.95	0		74868676	+	NM_033401	CNTNAP4	-279397	0	0	0
108	chr4	122831316	122831819	1101	504	263	26	256.19	40.75	0		122837597	-	NM_001154	ANXA5	-6018	0	0	1
109	chr8	102084958	102085681	1393	724	277	30	144.84	19.49	0.33		102034799	-	NM_003406	YWHAZ	50436	0	0	1	0.812844	0.732248
110	chr5	171545195	171545689	1188	495	288	19	144.53	28.52	0.33		171547951	-	NM_005990	STK10	-2468	0	0	0
111	chr15	39481623	39482198	491	576	407	18	145.09	36.23	0.33		39481934	-	NM_016013	NDUFAF1	96	1	0	1
112	chr2	104582398	104583316	828	919	447	31	146.37	20.34	0.34		104417236	+	NR_015399	LOC150568	165609	0	0	0
113	chr10	104378361	104378971	229	611	246	21	146.14	27.88	0.34		104394241	+	NM_030912	TRIM8	-15634	0	0	0	0.788168	0.788839
114	chr7	127078870	127079485	1339	616	458	20	145.69	38.13	0.34		127079437	+	NM_014390	SND1	-109	1	1	1		1.18349
115	chr17	59204677	59205320	630	644	169	19	147.46	29.43	0.34		59204820	-	NM_020198	CCDC47	26	1	0	1	0.376188	0.430542
116	chr1	46541699	46542267	42	569	198	18	146.02	31.7	0.34		46541966	+	NM_006004	UQCRH	-69	1	0	1
117	chr2	73817883	73818372	814	490	313	17	145.7	29.43	0.34		73818025	-	NM_016058	TPRKB	171	1	0	1
118	chr15	50341354	50341931	494	578	212	23	148.12	24.15	0.35		50375262	-	NM_018728	MYO5C	-33696	0	0	0	0.491186	0.491343
119	chr19	47521001	47521809	736	809	428	21	149.77	36.23	0.35		47521600	+	NM_001410	MEGF8	-171	1	1	1
120	chr2	7082516	7083122	774	607	353	21	149.55	27.11	0.35		6974973	+	NM_014746	RNF144A	107896	0	1	0
121	chr4	113371599	113372331	1099	733	422	20	147.67	33.96	0.35		113372343	+	NM_001128426	C4orf16	-322	1	0	1	0.568394	0.633344
122	chrX	99778281	99778778	1486	498	236	19	150.38	25.42	0.35		99778450	-	NM_003270	TSPAN6	67	0	0	0
123	chr15	33385982	33386401	485	420	170	17	149.12	28.47	0.35		33316818	+	NR_003144	LOC723972	69334	0	0	0
124	chr6	33466701	33467708	1236	1008	323	29	151.31	23.24	0.36		33467290	+	NM_002263	KIFC1	-266	1	1	1	0.8417
125	chr3	160965845	160966527	1042	683	220	26	150.74	20.83	0.36		161189322	+	NM_000882	IL12A	-223257	0	1	0
126	chr10	80809784	80810512	217	729	375	24	151.16	31.4	0.36		80777225	+	NM_005729	PPIF	32934	0	0	0	0.660616	0.701197
127	chr17	7095837	7096292	574	456	212	17	150.96	33.96	0.36		7096095	+	NM_203415	C17orf81	-46	1	0	1
128	chr8	101231633	101232492	1388	860	386	26	153.39	25.42	0.37		101232014	+	NM_005034	POLR2K	5	1	0	1		1.30476
129	chr8	29469417	29470308	1365	892	398	25	153.11	25.42	0.37		29661544	-	NR_026765	C8orf75	-191729	0	0	1
130	chr17	17290042	17290707	586	666	341	21	153.69	33.16	0.37		17321024	+	NM_018019	MED9	-30641	0	0	1
131	chr11	63841508	63842020	278	513	168	18	153.98	31.7	0.37		63841609	-	NM_016404	HSPC152	67	1	0	1
132	chr7	22109705	22110163	1302	459	299	18	154.28	34.57	0.37		21952067	-	NM_001127371	CDCA7L	157937	0	0	0	1.22343	1.19265
133	chr11	93156802	93157214	302	413	232	17	152.7	25.2	0.37		93157052	+	NM_004268	MED17	-18	1	0	1	1.20982
134	chr1	207857426	207858424	147	999	465	46	154.36	14.98	0.38		207891302	-	NM_001017402	LAMB3	-33411	0	0	0	1.78816	1.89858
135	chr14	68934675	68935295	459	621	358	20	155.45	21.05	0.38		68935159	+	NM_018375	SLC39A9	-126	1	0	1	1.21597
136	chr17	68701198	68701805	637	608	169	20	155.45	35.03	0.38		68700767	+	NM_018714	COG1	600	0	0	0	1.33979	1.27035
137	chr8	143693514	143694190	1413	677	455	20	154.33	33.96	0.38		143692835	-	NM_015193	ARC	1134	0	1	1
138	chr13	45524693	45525280	407	588	207	19	154.77	38.49	0.38		45524895	-	NM_015070	ZC3H13	5	1	0	1	1.43509	1.42554
139	chr1	159282156	159282780	106	625	294	26	157.42	25.98	0.39		159282381	-	NM_207005	USF1	69	1	0	0
140	chr5	102483492	102484083	1147	592	295	21	157.77	30.87	0.39		102483741	-	NM_017676	GIN1	46	1	1	1	1.27728	1.27431
141	chr19	17186865	17187274	704	410	222	17	157.02	33.16	0.39		17187154	+	NM_018467	USE1	-67	1	1	1	1.2692	1.27474
142	chr19	59651817	59652201	760	385	239	17	157	33.2	0.39		59651876	+	NM_052925	LENG8	180	0	1	1	1.28386
143	chr1	168030119	168031065	116	947	343	28	158.16	18.88	0.4		168030655	-	NM_033418	C1orf156	-193	1	0	1	1.69239	1.68921
144	chr1	154897411	154898087	100	677	454	27	158.26	20.34	0.4		154913813	-	NM_006617	NES	-15948	1	0	1
145	chr11	117995247	117996058	316	812	391	25	159.96	26.42	0.4		117983515	+	NM_001144759	PHLDB1	12123	0	0	0
146	chr1	197508376	197508978	134	603	209	25	158.65	27.84	0.4		196874759	+	NM_080922	PTPRC	633826	0	0	1
147	chr2	206732388	206733021	866	634	415	21	158.26	19.55	0.4		206732562	+	NM_001959	EEF1B2	241	1	1	1
148	chr2	114364736	114365353	832	618	416	25	159.96	25.13	0.41		114364006	+	NM_005721	ACTR3	1146	0	1	0	0.824128	0.828331
149	chr1	29080924	29081608	23	685	379	21	162.24	33.16	0.41		29086214	+	NM_203342	EPB41	-4911	0	0	1
150	chr10	93548619	93549319	220	701	277	21	162.32	29.43	0.41		93548130	+	NM_025235	TNKS2	766	0	0	0	0.36017	0.465979
151	chr19	9646657	9647057	690	401	171	17	160.43	36.23	0.41		9646776	-	NM_001130031	ZNF562	52	0	0	1	1.22437	1.3228
152	chr12	6924112	6924782	332	671	203	25	166.3	26.15	0.42		6923463	+	NM_138425	C12orf57	852	0	1	1
153	chr12	112153425	112154212	383	788	439	23	165.11	33.2	0.42		112143642	+	NM_017901	TPCN1	10222	0	0	0	0.828618
154	chr18	3237432	3237917	651	486	316	21	166.57	24.71	0.42		3237527	+	NM_006471	MRLC3	221	1	1	1
155	chr1	202751700	202752712	142	1013	407	36	167.97	24.72	0.43		202752133	+	NR_024171	MDM4	-26	1	0	1	1.58738	1.58442
156	chr11	130272716	130273598	321	883	376	29	169.22	25.44	0.43		130291592	-	NM_014758	SNX19	-18500	0	0	0	0.621691	0.618909
157	chr21	45323280	45323705	943	426	224	20	169.02	25.42	0.43		45318942	+	NM_001145407	ADARB1	4562	0	0	0
158	chr6	2934598	2935050	1201	453	250	19	167.22	32.54	0.43		2933199	+	NR_026856	DKFZP686I15217	1649	0	1	1
159	chr2	200875767	200876545	861	779	312	26	169.75	26.93	0.44		200878848	+	NM_015535	LOC26010	-2769	0	0	1
160	chr7	100647755	100648484	1332	730	306	22	169.68	36.23	0.44		100647731	-	NM_001084	PLOD3	330	1	0	0
161	chr11	2377899	2378627	244	729	264	22	169.81	24.91	0.44		2380098	+	NM_005706	TSSC4	-1935	1	0	1		1.2278
162	chr4	71772697	71773254	1078	558	374	20	170.71	36.23	0.44		71773059	+	NM_020368	UTP3	12	1	1	1	1.3703	1.36463
163	chr12	48421110	48422088	351	979	481	25	173.05	36.23	0.45		48421559	+	NM_003217	TMBIM6	32	1	0	1	1.22455	1.21712
164	chr1	173265148	173265873	122	726	450	24	172.19	36.91	0.45		173259184	-	NM_022100	MRPS14	6414	0	1	0	1.16136	0.787775
165	chr6	28425408	28426103	1223	696	260	22	174.09	43.02	0.45		28425669	+	NM_024493	ZKSCAN3	-1	1	0	1
166	chr19	7600431	7600831	687	401	171	18	173.13	33.96	0.45		7600439	-	NM_020196	XAB2	163	1	0	1
167	chr8	22608738	22609067	1360	330	166	18	171.39	40.75	0.45		22606760	-	NM_004430	EGR3	2144	0	1	1		0.569094	75.2333	44.7811
168	chr10	75173924	75174546	216	623	217	23	174.4	34.57	0.46		75174137	+	NM_004922	SEC24C	4	1	0	1
169	chr7	130407211	130407735	1342	525	264	21	174.95	33.24	0.46		130442329	-	NR_024153	FLJ43663	-34854	0	0	0
170	chr8	22606868	22607400	1359	533	157	20	174.62	40.75	0.46		22606760	-	NM_004430	EGR3	265	0	1	0		0.569094	75.2333	44.7811
171	chr19	1979711	1980102	681	392	229	18	174.91	33.96	0.46		1966702	-	NM_017797	BTBD2	13238	0	0	1	0.849939
172	chr8	105481529	105482420	1397	892	457	40	176.27	20.34	0.47		105421229	+	NM_030788	TM7SF4	60757	0	0	0
173	chr8	122824229	122824864	1403	636	204	28	177.79	27.96	0.47		122722811	-	NM_005328	HAS2	101622	0	0	1
174	chr18	32143441	32144103	661	663	179	24	176.1	33.31	0.47		32131699	+	NM_025135	FHOD3	11921	0	0	0	0.559813	0.536027
175	chr6	139392336	139392905	1276	570	244	22	177.89	34.77	0.47		139391511	+	NM_021243	C6orf115	1069	0	1	0	0.801034	0.842248
176	chr19	56766063	56766508	756	446	229	19	177.29	36.23	0.47		56766342	+	NM_007147	ZNF175	-50	1	0	0	1.44567	1.29645
177	chr1	221919739	221920406	157	668	367	34	178.24	20.34	0.48		221920059	-	NM_001143962	CAPN8	47	0	0	0
178	chr11	73559078	73560303	291	1226	839	32	178.98	30.27	0.48		73560015	+	NM_016147	PPME1	-98	1	1	1	0.640101	0.777689
179	chrX	51562540	51563348	1476	809	378	27	179.7	34.55	0.48		51562894	+	NM_001005332	MAGED1	24	1	1	0		0.853855
180	chr16	30273928	30274576	543	649	293	22	180.38	31.63	0.48		30274183	-	NM_006110	CD2BP2	38	1	0	1		1.23346
181	chr8	90983128	90983718	1384	591	251	25	182.78	31.55	0.49		90983268	+	NM_004337	OSGIN2	111	0	1	1	0.7716	0.747325
182	chr2	66515563	66516063	809	501	200	25	182.78	24.2	0.49		66516035	+	NM_002398	MEIS1	-272	0	1	1
183	chr9	33254833	33255199	1431	367	181	19	181.26	33.24	0.49		33254876	+	NM_016410	CHMP5	138	1	0	1	0.86442
184	chr14	22634162	22634988	430	827	357	25	185.75	36.78	0.5		22634627	+	NM_017924	C14orf119	-108	1	1	1
185	chr17	65269403	65269893	635	491	334	21	184.44	36.6	0.5		65583020	+	NM_018658	KCNJ16	-313283	0	0	0
186	chr1	149698543	149699111	86	569	151	24	186.34	38.34	0.51		149698556	-	NM_145796	POGZ	138	1	0	1	1.81744	1.88197
187	chr2	74007156	74007688	815	533	330	21	186.72	38.49	0.51		74007460	+	NM_080916	DGUOK	26	1	0	1	0.826178
188	chr19	56303306	56303640	755	335	168	20	187.29	34.06	0.51		56303459	-	NM_145232	ATPBD3	15	1	0	1
189	chr17	7327674	7328137	575	464	219	20	186.54	38.49	0.51		7328292	-	NM_020899	ZBTB4	-399	0	0	1	1.26167	1.36299
190	chr1	154170442	154171382	97	941	451	33	188.04	22.88	0.52		154170812	-	NM_014949	KIAA0907	81	1	0	1	1.21661
191	chr20	25166336	25166836	902	501	214	30	188.04	21.18	0.52		25176705	+	NM_002862	PYGB	-10155	0	0	0	1.21138	1.23838
192	chr14	55735539	55736048	447	510	192	23	187.46	33.89	0.52		55654845	+	NM_021255	PELI2	80886	0	0	1
193	chr12	14992993	14993472	339	480	164	22	188.12	34.5	0.52		14982730	-	NM_152321	ERP27	10427	0	1	0
194	chr6	27578192	27578884	1218	693	319	26	189.38	35.59	0.53		27548876	-	NM_007149	ZNF184	29635	0	0	0	0.84497	0.804533
195	chr8	145020273	145020924	1418	652	298	23	189.38	33.15	0.53		145019422	-	NM_031308	EPPK1	1149	0	0	0	0.7729
196	chr4	15288394	15288755	1063	362	194	23	189.38	25.76	0.53		15292449	+	NM_001145191	LOC285550	-3861	0	0	1	0.491977	0.446092
197	chr3	186482847	186483574	1049	728	487	30	191.87	29.23	0.54		186454531	-	NM_001966	EHHADH	28803	0	0	1
198	chr6	42966406	42967051	1246	646	166	28	189.8	30.21	0.54		42966532	-	NM_001008739	C6orf226	40	1	0	1	1.32161
199	chr11	106833547	106834283	309	737	290	25	191.3	40.67	0.54		106833782	-	NM_152434	CWF19L2	55	1	0	1		0.826941
200	chr6	41612458	41613221	1243	764	382	28	193.04	38.57	0.55		41622141	+	NM_001012427	FOXP4	-9301	0	0	0	1.3313	1.29133
201	chr3	170965581	170966178	1045	598	156	27	193.54	31.92	0.55		170965542	-	NR_001566	TERC	195	1	0	1
202	chr3	45495903	45496556	994	654	363	26	193.54	34.91	0.55		45405078	+	NM_015340	LARS2	91188	0	0	0
203	chr19	50912396	50912911	744	516	169	22	191.96	28.47	0.55		50925991	-	NM_001080469	FBXO46	-13426	0	1	1
204	chr1	25431367	25432079	18	713	271	24	194.46	38.49	0.56		25431600	-	NM_207170	SYF2	38	1	0	1	1.23626	1.28972
205	chr2	37716142	37716546	796	405	201	22	196.03	33.34	0.56		37752830	-	NM_006449	CDC42EP3	-36487	0	0	0
206	chr19	8360659	8361149	688	491	169	21	194.12	36.23	0.56		8361204	+	NM_004218	RAB11B	-376	1	1	1
207	chr11	34895935	34896667	264	733	343	35	197	24.03	0.57		34894515	-	NM_015957	APIP	1763	0	0	1	1.19101	1.20134
208	chr11	117627751	117628622	315	872	526	33	197.97	22.88	0.57		117628221	-	NM_198275	MPZL3	56	1	0	1	0.448232	0.492939
209	chr3	38153545	38154554	986	1010	657	31	196.78	23.72	0.57		38153737	-	NM_001130410	ACAA1	465	0	0	1
210	chr14	68460621	68461517	457	897	439	31	199.69	35.43	0.58		68515836	-	NM_001130005	ACTN1	-54776	0	0	0	0.818818
211	chr8	117836995	117837538	1401	544	337	30	200.14	24.4	0.58		117837243	-	NM_003756	EIF3H	89	1	1	1
212	chr1	43627595	43628490	41	896	480	29	199.64	34.5	0.58		43628070	-	NM_052877	MED8	5	1	0	1	1.1554	1.16967
213	chr4	119825524	119826114	1100	591	436	19	134.96	36.6	0.58		119826021	+	NM_020961	METTL14	-61	1	0	0	1.2638	1.55426
214	chr1	154461822	154462227	98	406	167	18	133.82	22.02	0.58		154449407	+	NM_007221	PMF1	12582	0	1	1	1.16528	1.2876
215	chr2	113058269	113058942	831	674	251	24	200.15	36.23	0.59		113058506	+	NM_032309	CHCHD5	14	0	0	1	1.18922	1.23323
216	chr12	54607018	54607543	360	526	169	23	200.26	43.02	0.59		54607176	-	NM_001143853	WIBG	11	1	0	1	0.593223	0.694765
217	chr19	47055403	47055942	734	540	314	20	136.2	24.69	0.59		47055827	+	NM_001022	RPS19	-110	1	0	1	1.26627	1.33322
218	chr1	235024830	235025346	170	517	238	20	136.33	19.5	0.59		235025203	+	NM_000254	MTR	-135	1	0	0	1.61525	1.9738
219	chr4	84352805	84353398	1087	594	167	19	136.32	30.87	0.59		84424988	-	NM_015697	COQ2	-72016	0	1	0
220	chr7	63411608	63412347	1314	740	284	19	136.4	22.64	0.59		63326286	+	NM_153363	ZNF679	85606	1	0	0
221	chr1	40496032	40496508	35	477	258	16	135.95	31.7	0.59		40496319	+	NM_005857	ZMPSTE24	-29	1	1	1	0.716333	0.679716
222	chr11	17237828	17238563	258	736	376	26	202.68	40.75	0.6		17254861	+	NM_005013	NUCB2	-16657	0	0	0	1.18536
223	chr17	38385341	38386172	605	832	344	26	200.92	43.02	0.6		38385546	-	NM_025267	AARSD1	139	1	1	1
224	chr6	32034464	32035231	1231	768	435	24	138.03	23.36	0.6		32034843	-	NM_002904	RDBP	56	1	0	1		1.2494
225	chr4	169974251	169974952	1120	702	196	21	137	20.34	0.6		170167997	-	NM_032783	CBR4	-193550	0	1	0		0.802764
226	chr1	175681532	175682059	124	528	242	21	136.76	20.34	0.6		175407255	+	NM_021165	FAM5B	274519	0	0	0
227	chr19	42355050	42355762	722	713	376	20	137.8	21.51	0.6		42355455	-	NM_152655	ZNF585A	-29	0	0	0	1.52392	1.2924
228	chr15	87360954	87361287	516	334	168	16	138.11	27.11	0.6		87432384	+	NM_152924	ABHD2	-71262	0	0	0	0.432392	0.478242
229	chr14	91960997	91961926	473	930	417	31	202.99	34.44	0.61		92049877	+	NM_024832	RIN3	-88463	0	0	0	1.41057	1.3233
230	chr17	44624822	44625475	618	654	198	24	203.21	47.55	0.61		44641742	-	NM_031498	GNGT2	-16722	0	1	1
231	chr1	220829357	220830102	154	746	368	23	139.53	16.45	0.61		220829878	-	NM_139352	TAF1A	-153	1	0	0	1.23943
232	chr1	182635054	182635703	128	650	344	21	139.42	25.82	0.61		182622772	+	NM_030806	C1orf21	12626	0	0	0
233	chr3	41978495	41979120	991	626	309	18	138.74	31.7	0.61		41978664	-	NM_017886	ULK4	140	1	0	1	1.8543	1.64646
234	chr1	153243143	153243763	94	621	168	27	204.46	36.31	0.62		153241735	+	NM_015872	ZBTB7B	1576	0	0	1	1.2527	1.37179
235	chr17	34609386	34610173	601	788	442	26	206.82	40.75	0.62		34610061	+	NM_000981	RPL19	-233	1	0	1
236	chr4	148757773	148758430	1110	658	219	19	140.43	33.89	0.62		148757988	+	NM_018241	TMEM184C	4	1	1	0	0.658639	0.650002
237	chr9	5841464	5841918	1421	455	166	19	139.77	23.24	0.62		5823081	-	NM_024896	ERMP1	18549	0	0	1	1.80128	1.77491
238	chr8	38827589	38828050	1372	462	182	18	139.81	25.42	0.62		38877909	+	NM_021623	PLEKHA2	-50138	0	0	0	0.609618	0.618892
239	chr12	107609194	107609830	379	637	423	34	206.98	26.83	0.63		107649424	-	NM_014325	CORO1C	-39807	0	1	0	0.740063	0.734331
240	chr7	91915485	91916339	1322	855	308	31	140.84	17.39	0.63		91914700	+	NM_021167	GATAD1	1093	0	0	1	1.71506	1.8467
241	chr20	33935166	33935712	906	547	356	23	140.86	20.02	0.63		34005842	-	NM_016558	SCAND1	-70320	0	0	1		0.819153
242	chr17	37340172	37340809	604	638	240	23	140.86	22.06	0.63		37340413	+	NM_031421	TTC25	-1	1	0	1
243	chr6	13561998	13562344	1207	347	176	23	207.27	31.07	0.63		13594394	-	NM_033069	C6orf114	-32220	0	0	0
244	chr9	126122406	126122931	1454	526	161	23	140.86	22.46	0.63		126060065	+	NM_014397	NEK6	62502	0	0	1	0.81978	0.788386
245	chr20	47269063	47269699	918	637	259	20	140.99	19.97	0.63		47269238	+	NM_017895	DDX27	84	1	0	1	1.41032	1.48309
246	chr16	75782088	75782847	560	760	463	26	210.76	31.7	0.64		75782336	+	NM_014940	MON1B	215	1	0	1	1.52466	1.45739
247	chr3	88281499	88281984	1012	486	244	22	207.73	40.75	0.64		88281582	+	NM_173824	C3orf38	161	1	0	0	1.89667	1.75526
248	chr5	130998937	130999523	1154	587	165	21	141.44	22.38	0.64		130998828	-	NM_016340	RAPGEF6	274	0	1	1
249	chr17	4581037	4581828	568	792	455	20	141.23	31.7	0.64		4581471	+	NM_001001683	MED11	21	1	0	1	1.26051	1.36175
250	chr6	109810570	109810937	1266	368	210	16	141.13	26.36	0.64		109810455	-	NM_001142402	CD164	325	1	0	1	1.87689	1.75636
251	chr1	223911643	223912369	159	727	497	32	211.91	33.04	0.65		223907468	-	NM_018212	ENAH	4672	0	0	0	0.729054	0.709407
252	chr11	76436026	76436851	295	826	433	30	213.65	45.19	0.65		76423082	+	NM_138706	B3GNT6	13377	1	1	1
253	chr14	44674391	44675184	442	794	358	21	142.09	32.54	0.65		44674885	+	NM_020937	FANCM	-136	1	0	0
254	chr15	88609740	88610044	517	305	153	18	212.05	40.75	0.65		88609898	+	NM_016645	NGRN	-5	1	0	1	0.691907	0.6868
255	chr6	28199989	28200495	1220	507	345	17	143.21	29.43	0.65		28200365	+	NM_025231	ZSCAN16	-31	0	0	1
256	chr4	40687211	40687805	1072	595	244	27	143.53	19.88	0.66		40911392	-	NM_173075	APBB2	-223937	0	0	0	0.564311	0.619743
257	chr3	57558160	57558681	1002	522	326	24	215.25	36.6	0.66		57558255	-	NM_001660	ARF4	231	1	0	1	0.78966	0.749239
258	chr22	38258407	38258992	965	586	427	24	214.41	49.81	0.66		38258806	-	NM_194326	RPS19BP1	28	1	0	1	1.2781	1.3207
259	chr14	38709121	38709627	439	507	212	23	216.42	43.02	0.67		38709385	-	NM_001079537	TRAPPC6B	-52	1	0	1
260	chr17	71174666	71175252	640	587	332	27	218.8	35.59	0.68		71174993	+	NM_013260	SAP30BP	5	1	1	1	1.37162	1.34321
261	chr17	46081501	46081923	622	423	223	22	220.93	45.28	0.68		46067216	+	NM_003786	ABCC3	14508	0	1	0	1.64183	1.76367
262	chr7	5699501	5700314	1296	814	421	33	224.79	33.41	0.69		5787818	-	NM_207116	RNF216	-87896	0	0	0	0.732155
263	chr1	100004561	100004977	67	417	253	22	222.3	40.75	0.69		100003937	-	NM_001013660	FRRS1	877	0	0	1
264	chr17	7083539	7084133	573	595	425	25	225.19	49.81	0.7		7083549	-	NM_024297	PHF23	415	1	0	1	0.596362	0.591228
265	chr3	14667708	14668674	976	967	469	31	227.82	33.2	0.71		14668256	+	NM_016474	C3orf19	-79	1	1	1	1.57878	1.70287
266	chr19	55571167	55571905	754	739	335	27	225.55	36.23	0.71		55571496	+	NM_007121	NR1H2	6	1	0	1
267	chr1	8079822	8080401	3	580	364	26	228.64	34.57	0.72		8008980	-	NM_018948	ERRFI1	71206	0	0	1	1.5371	1.31001	1.39058
268	chr1	221955407	221956067	158	661	441	35	228.87	29.35	0.73		221966741	+	NM_001748	CAPN2	-10893	0	0	0
269	chr12	111331179	111332197	381	1019	169	33	232.27	31.7	0.74		111331826	-	NM_000970	RPL6	-478	1	0	1
270	chr14	74538801	74539538	465	738	377	28	229.74	38.13	0.74		74539364	+	NM_014239	EIF2B2	-186	1	1	1	1.19515
271	chr11	65525890	65526599	284	710	394	22	102.67	11.34	0.74		65526154	-	NM_032325	EIF1AD	130	1	1	1	1.23907	1.18664
272	chr13	29149486	29150051	401	566	170	22	102.67	15.62	0.74		29067825	-	NM_003045	SLC7A1	81831	0	0	0	0.628651	0.755925
273	chr13	44936609	44937154	406	546	335	15	101.87	21.79	0.74		44937071	+	NM_031431	COG3	-127	1	1	1	1.22144	1.17682
274	chr2	216682025	216682622	868	598	346	15	102.03	21.93	0.74		216682264	+	NM_021141	XRCC5	107	1	0	1	0.798857	0.771268
275	chr1	119132547	119133215	79	669	207	30	237.66	40.67	0.75		119333702	-	NM_152380	TBX15	-200948	0	0	0
276	chr17	7427960	7428342	576	383	202	23	233.6	38.64	0.75		7427688	+	NM_004870	MPDU1	474	1	0	1
277	chr1	166414966	166415534	114	569	239	18	103.03	13.98	0.75		166414794	+	NM_001031800	TIPRL	411	0	0	0	0.57378	0.665914
278	chr18	3613707	3614279	653	573	355	17	102.98	20.34	0.75		3584111	+	NR_024101	FLJ35776	29951	0	0	1
279	chr20	29790329	29790919	903	591	280	15	103.06	26.04	0.75		29790564	+	NM_012112	TPX2	45	1	0	0	0.773684
280	chr6	160372353	160373001	1289	649	226	15	103.06	24.2	0.75		160434103	+	NR_003288	LOC729603	-61524	0	0	0
281	chr12	64216997	64217539	366	543	226	30	238.1	33.13	0.76		63958754	+	NM_198080	MSRB3	258469	0	0	1
282	chr17	53020527	53021173	625	647	172	26	124.7	16.1	0.76		53282398	-	NM_016070	MRPS23	-261699	0	0	0
283	chr4	84595665	84596480	1088	816	341	24	104.6	13.22	0.76		84596049	-	NM_133636	HELQ	-43	1	0	1	1.28042	1.22942
284	chr19	43865836	43866473	726	638	370	20	103.29	19.06	0.76		43830166	+	NM_004924	ACTN4	36040	0	1	0	0.823685
285	chr15	82975515	82976092	515	578	168	19	104.84	15.28	0.76		82975694	+	NR_004859	SCAND2	-11	1	1	1
286	chr10	20332381	20333051	194	671	402	16	104.33	27.91	0.76		20145377	+	NM_032812	PLXDC2	187406	0	0	0	0.661483	0.68573
287	chr4	140436080	140436628	1104	549	421	14	104.86	29.43	0.76		140436407	-	NM_002494	NDUFC1	94	1	0	1	0.763548	0.752508
288	chr6	42955191	42955647	1245	457	153	13	104.75	22.64	0.76		42955648	+	NM_198486	RPL7L1	-304	1	0	1	0.840812
289	chr5	82408707	82409625	1146	919	458	33	238.51	38.13	0.77		82409072	+	NM_022406	XRCC4	93	1	0	1	1.26839	1.27131
290	chr1	168129506	168130177	117	672	205	21	104.96	15.47	0.77		168129700	-	NM_181093	SCYL3	11	1	1	1	1.38051	1.31155
291	chr17	70542750	70543429	639	680	265	21	126.6	20.34	0.77		70554669	-	NM_006356	ATP5H	-11654	0	0	1	1.18766
292	chr1	58993617	58994412	55	796	439	20	105.01	11.62	0.77		59022373	-	NM_002228	JUN	-28317	0	0	0			7.24148	7.05189
293	chr1	11890074	11890823	9	750	443	17	104.91	21.51	0.77		11909067	-	NM_138346	KIAA2013	-18550	0	1	1	0.620404	0.628134
294	chr20	5791641	5792199	890	559	396	17	125.58	23.46	0.77		5839973	+	NM_001819	CHGB	-47936	0	0	0
295	chr6	159340483	159341035	1287	553	394	16	125.83	31.7	0.77		159341186	-	NM_031924	RSPH3	-309	1	1	1	1.65446	1.57417
296	chrX	153254209	153254677	1494	469	171	15	125.57	29.43	0.77		153256200	-	NM_001456	FLNA	-1820	0	1	0	0.504042	0.762653
297	chr1	46855151	46855606	43	456	133	14	104.93	16.95	0.77		46855150	-	NM_201403	MOBKL2C	134	0	1	1	1.29546
298	chr16	4278134	4278681	530	548	369	14	104.97	24.91	0.77		4263002	-	NM_003223	TFAP4	15501	0	0	0
299	chr5	54032612	54033328	1139	717	403	33	241.9	40.67	0.78		53849349	+	NM_001102575	SNX18	183666	0	0	0
300	chr9	19370008	19370686	1424	679	288	30	240.05	43.83	0.78		19370235	-	NM_001010	RPS6	61	1	1	1
301	chr5	143547361	143548126	1171	766	329	22	126.7	25.05	0.78		143530629	+	NM_020768	KCTD16	17061	0	0	1
302	chr6	91353403	91354171	1263	769	405	21	105.36	20.34	0.78		91353628	-	NM_145333	MAP3K7	180	1	0	1	0.567999	0.626435
303	chr5	147743274	147743958	1173	685	303	21	105.19	13.56	0.78		147743738	+	NM_030793	FBXO38	-161	1	0	1	1.31946	1.31388
304	chr17	12862032	12862571	580	540	224	16	127.45	29.43	0.78		12862084	-	NM_018127	ELAC2	172	1	0	1
305	chr20	48108913	48109430	920	518	233	15	105.17	19.97	0.78		48163117	-	NM_001032288	UBE2V1	-53971	0	0	0	0.861186
306	chr19	45288227	45288855	732	629	461	27	243.97	49.81	0.79		45288685	-	NM_001142579	ZNF780A	3	1	0	1
307	chr1	28527825	28528390	21	566	291	26	243.25	49.81	0.79		28528099	+	NM_017638	MED18	17	1	0	1	1.16357
308	chr12	54838863	54839782	361	920	474	23	106.12	19.06	0.79		54838366	+	NM_021019	MYL6	971	0	1	0
309	chr11	102467870	102468490	307	621	319	17	128.55	29.43	0.79		102468079	-	NM_032299	DCUN1D5	110	1	0	1	0.796573	0.852252
310	chr18	72291707	72292108	675	402	238	16	127.81	23.72	0.79		72304043	-	NM_014643	ZNF516	-12098	0	0	0
311	chr11	125855850	125856294	320	445	156	16	128.07	24.48	0.79		125731305	+	NM_006278	ST3GAL4	124701	1	0	1	1.54285	1.73674
312	chr4	158155811	158156181	1118	371	226	13	106.1	22.59	0.79		158111996	-	NM_016205	PDGFC	44041	0	0	0	0.774883	0.768483
313	chr9	130020834	130021192	1457	359	130	12	106.55	24.91	0.79		130006483	-	NM_012127	CIZ1	14481	0	0	1	1.75129	1.93238
314	chr1	218972695	218973604	153	910	464	33	107.4	13.98	0.8		218988298	+	NM_017898	MOSC2	-15139	1	0	0	0.734966	0.692344
315	chr3	150858659	150859579	1038	921	472	31	245.27	56.6	0.8		150858472	-	NM_015472	WWTR1	659	0	0	0	0.543134	0.613826
316	chr10	128138159	128139088	239	930	465	26	107.16	23.39	0.8		128200000	-	NM_001004298	C10orf90	-61376	0	0	1
317	chr8	40151239	40151812	1373	574	233	21	129.64	19.06	0.8		40130145	+	NM_020130	C8orf4	21327	0	0	1
318	chr6	33347384	33348143	1234	760	449	21	107.39	15.45	0.8		33347829	+	NM_022551	RPS18	4	1	0	1
319	chr3	197118159	197118891	1058	733	281	16	106.9	24.91	0.8		197120277	-	NM_005781	TNK2	-1837	0	0	0		1.26787
320	chr12	119608815	119609168	394	354	165	15	128.92	25.2	0.8		119609331	+	NM_014730	MLEC	-351	1	0	1	0.47895	0.590976
321	chr17	7530383	7531288	577	906	287	33	245.37	26.36	0.81		7530113	+	NM_001143990	WRAP53	557	1	0	1
322	chr1	210168964	210170001	149	1038	168	30	107.72	15.71	0.81		210070737	-	NM_014873	LPGAT1	98395	0	0	1	0.761223
323	chr1	230996036	230996696	165	661	420	29	129.96	16.7	0.81		231007260	+	NM_019090	KIAA1383	-10804	0	0	0
324	chr8	79282791	79283251	1382	461	252	26	245.57	41.42	0.81		79590890	+	NM_006823	PKIA	-307847	0	0	1
325	chr4	130012486	130012989	1102	504	201	18	108.28	16.95	0.81		129950228	+	NM_199320	PHF17	62459	0	0	0
326	chr2	28526095	28526796	790	702	440	18	130.08	24.91	0.81		28572485	+	NM_153021	PLB1	-45950	0	0	1
327	chr4	148718716	148719152	1108	437	200	15	130.15	27.17	0.81		148757988	+	NM_018241	TMEM184C	-39072	0	0	1	0.658639	0.650002
328	chr16	27187532	27187831	541	300	151	11	108.5	24.91	0.81		27187614	-	NM_145080	NSMCE1	69	1	0	0	1.17624	1.27833
329	chr5	6686059	6686345	1129	287	144	10	108.5	22.64	0.81		6686157	-	NM_017755	NSUN2	46	1	0	1	0.848884	0.821439
330	chr11	66786492	66787387	285	896	448	32	246.13	48.8	0.82		66790480	+	NM_001619	ADRBK1	-3540	0	1	1
331	chrX	64840268	64841145	1480	878	417	27	130.93	23.72	0.82		64804235	+	NM_002444	MSN	36450	0	0	0	1.56181	1.61241
332	chr1	159390016	159390932	107	917	559	26	130.33	16.52	0.82		159390157	+	NM_016406	UFC1	418	1	0	1	1.15529	1.23309
333	chr22	40194212	40195176	966	965	518	24	130.51	14.02	0.82		40194654	-	NM_032758	PHF5A	76	1	1	1	0.42842	0.457941
334	chr17	8227150	8227486	578	337	169	14	131.36	30.94	0.82		8227290	-	NM_000987	RPL26	29	1	0	1
335	chr10	72961142	72961934	215	793	388	40	246.19	27.45	0.83		72826709	+	NM_022124	CDH23	134821	0	1	0
336	chr17	53950345	53951126	628	782	317	33	246.6	34.44	0.83		53950250	-	NM_004687	MTMR4	412	1	1	1	0.471563	0.481717
337	chr14	44500566	44501165	441	600	432	20	131.56	21.35	0.83		44500929	-	NM_017658	KLHL28	69	1	0	1	1.62712	1.51804
338	chr2	172251903	172252426	847	524	366	18	131.55	25.85	0.83		172252227	+	NM_001378	DYNC1I2	42	1	0	1	1.23041	1.23374
339	chr1	94951733	94952341	65	609	365	17	109.43	20.34	0.83		95058488	+	NM_001114106	SLC44A3	-106390	0	1	0	0.718156	0.688888
340	chr6	160130683	160131065	1288	383	167	14	109.06	22.03	0.83		160130725	-	NM_001008897	TCP1	125	1	0	1	0.856072	0.792481
341	chr12	6642360	6642998	329	639	299	28	246.75	46.6	0.84		6642569	-	NM_001127584	ING4	90	1	1	1	1.16164
342	chr1	149404646	149405609	84	964	532	26	110.64	18.92	0.84		149405140	+	NM_024041	SCNM1	38	1	0	1	1.26478	1.24572
343	chr2	71148800	71149407	813	608	193	22	131.57	23.49	0.84		71148915	+	NM_017567	NAGK	78	0	0	1		0.848203
344	chr10	15942245	15942947	191	703	306	16	109.67	27.17	0.84		15942525	-	NM_024948	C10orf97	26	1	0	1
345	chr4	23771101	23771474	1068	374	217	13	109.98	24.4	0.84		23500798	-	NM_013261	PPARGC1A	270520	0	0	0	0.583945	0.567633
346	chr15	89119091	89119680	520	590	390	28	249.38	39.99	0.85		89061582	+	NM_000057	BLM	57899	0	0	0
347	chr12	102776867	102777356	377	490	287	27	247.3	43.58	0.85		102759105	-	NM_001031701	NT5DC3	18049	0	0	1
348	chr1	149778425	149779282	87	858	487	26	132.11	20.58	0.85		149779404	+	NM_020127	TUFT1	-492	0	1	0
349	chr8	104496509	104497187	1396	679	296	19	111.07	16.95	0.85		104496644	-	NM_030780	SLC25A32	161	1	1	1
350	chr5	177865079	177865565	1195	487	230	17	112.31	18.36	0.85		177950162	-	NM_173465	COL23A1	-84853	0	0	0
351	chr14	31483719	31484422	436	704	389	17	112.04	28.47	0.85		31615656	-	NR_027263	C14orf128	-131548	0	0	0		0.763363
352	chr7	83343888	83344200	1319	313	157	14	132.15	25.88	0.85		83116260	-	NM_012431	SEMA3E	227785	0	0	0
353	chr4	79692537	79693026	1086	490	201	28	251.78	38.98	0.86		79691765	+	NM_005139	ANXA3	973	0	0	0	0.756632	0.79614
354	chr11	82581936	82582526	298	591	404	19	133.47	33.89	0.86		82582938	+	NM_182603	ANKRD42	-598	1	0	1
355	chr16	23559961	23560740	539	780	312	19	132.25	31.7	0.86		23560307	+	NM_032486	DCTN5	-34	1	0	1	0.509973	0.546343
356	chr22	36334050	36334573	959	524	376	16	113.07	26.64	0.86		36334448	+	NM_001001561	GGA1	-22	1	0	1	1.30293	1.31456
357	chr1	53476617	53477047	52	431	231	16	112.69	20.34	0.86		53476795	-	NM_002370	MAGOH	53	1	0	1	1.21765
358	chr1	159625986	159626489	109	504	362	16	112.54	23.72	0.86		159604288	-	NM_001013625	C1orf192	22060	0	1	0
359	chr3	44641191	44641638	993	448	279	16	132.88	28.47	0.86		44641514	+	NM_001024855	ZNF197	-44	1	0	1	1.3708	1.24384
360	chr11	120767739	120768315	318	577	241	17	113.21	22.03	0.87		120828170	+	NM_003105	SORL1	-60190	0	0	0		0.689331
361	chr20	33335641	33336208	905	568	400	15	113.29	31.7	0.87		33336008	-	NM_181466	EIF6	33	1	1	1
362	chr12	11921768	11922600	335	833	533	21	113.55	20.33	0.88		12115144	+	NM_138723	BCL2L14	-192843	0	0	0
363	chr4	155305983	155306467	1116	485	138	15	114.02	17.6	0.88		155531899	-	NM_017639	DCHS2	-225778	0	0	0
364	chr1	150059368	150059867	89	500	172	20	115.16	18.68	0.89		150065177	-	NM_001001523	RORC	-5637	0	0	0		1.2458
365	chr5	157090829	157091454	1178	626	145	19	114.85	18.88	0.89		157090900	+	NM_017872	THG1L	74	1	0	1	1.35675	1.32254
366	chr6	76009803	76010533	1254	731	422	23	115.98	20.34	0.9		76010245	-	NM_001865	COX7A2	-20	1	1	1
367	chr1	233597113	233597826	169	714	241	24	116.69	12.2	0.91		233597350	+	NM_001079515	TBCE	4	1	0	0
368	chr2	71081525	71082110	812	586	360	19	100.92	16.52	0.91		71075509	-	NM_144582	TEX261	6376	1	0	1	0.775772	0.865007
369	chr6	43246474	43247110	1247	637	414	16	116.26	29.43	0.91		43246897	+	NM_003131	SRF	-9	0	1	0	0.79244
370	chr15	75143925	75144367	512	443	143	15	100.99	13.07	0.91		75150568	-	NM_198902	TSPAN3	-6500	0	0	0	0.541559	0.513291
371	chr6	83949822	83950284	1256	463	299	13	100.29	23.3	0.91		83959654	-	NM_015599	PGM3	-9533	0	0	0
372	chr10	95185795	95186105	223	311	156	12	100.23	18.97	0.91		95232064	-	NM_133337	MYOF	-46113	0	0	1	0.321428	0.319143
373	chr20	34923609	34924063	907	455	294	15	116.87	26.86	0.92		34921690	-	NM_199181	C20orf117	2213	0	0	0	0.843666
374	chr10	56797334	56797701	207	368	165	14	117.42	24.32	0.92		56231057	-	NM_033056	PCDH15	566442	0	1	0
375	chr1	158579345	158580032	104	688	377	22	118.94	18.16	0.93		158579686	+	NM_015331	NCSTN	36	1	0	1	1.28548	1.40502
376	chr22	36613514	36613951	961	438	195	14	118.43	22.64	0.93		36632291	+	NM_033386	MICALL1	-18582	0	0	0	0.668107	0.728066
377	chr1	22224119	22225020	16	902	438	23	119.64	24.69	0.94		22224628	+	NR_023919	HSPC157	-71	1	0	1
378	chr1	28704815	28705499	22	685	275	19	119.78	22.03	0.94		28705082	+	NM_001048197	SNHG3-RCC1	8	1	0	1
379	chr4	95347632	95348455	1091	824	375	19	119.6	30.5	0.94		95348038	+	NM_001128429	SMARCAD1	-31	1	0	1
380	chr19	2927716	2928418	682	703	380	17	119.71	27.17	0.94		2928535	+	NM_001143986	TLE6	-439	0	0	0
381	chr15	37658851	37659648	489	798	443	18	120.51	24.91	0.95		37660571	+	NM_003246	THBS1	-1277	0	0	0			1.8946	2.1187
382	chr1	149919859	149920310	88	452	204	16	119.86	23.72	0.95		149955914	-	NM_007185	TNRC4	-35851	0	0	0
383	chr1	9860733	9861043	5	311	156	12	120.52	27.17	0.95		9892903	-	NM_020248	CTNNBIP1	-32014	0	0	0
384	chr1	148532459	148533258	82	800	418	22	121.66	20.34	0.96		148532892	+	NM_018997	MRPS21	-15	1	1	1		1.15232
385	chr3	84065990	84066571	1009	582	207	19	121.88	20.71	0.96		85858321	+	NM_153184	CADM2	-1792124	0	0	1
386	chr10	10874570	10875024	186	455	189	19	121.88	15.04	0.96		10876883	-	NR_027082	SFTA1P	-2124	0	0	0
387	chr12	122024978	122025393	396	416	252	14	121.56	24.91	0.96		122025306	+	NM_024623	OGFOD2	-76	1	0	1	1.20483
388	chr10	105145990	105146529	230	540	329	19	121.96	17.86	0.97		105146401	+	NM_014976	PDCD11	-82	1	0	1		0.826486
389	chr22	36575078	36575743	960	666	256	19	121.96	28.81	0.97		36575315	+	NM_016091	EIF3L	19	1	0	0
390	chr1	159635394	159636163	110	770	377	21	122.47	25.05	0.98		159604288	-	NM_001013625	C1orf192	31483	1	0	1
391	chr19	49198782	49199348	739	567	170	19	122.49	24.69	0.98		49198916	+	NM_006300	ZNF230	36	0	0	0
392	chrX	118583191	118583684	1491	494	325	15	122.23	31.7	0.98		118583392	-	NM_022101	CXorf56	124	1	1	1	1.32575	1.25389
393	chr20	44751464	44752039	914	576	159	16	123.06	24.91	0.99		44751683	-	NM_033550	TP53RK	-60	0	0	0
394	chr4	184664307	184664729	1125	423	190	15	122.77	23.46	0.99		184663213	+	NM_001564	ING2	1284	1	0	1	1.37665
395	chr6	29752825	29753379	1225	555	395	18	123.53	24.6	1		29756866	-	NM_001109809	ZFP57	-3646	0	0	0
396	chr1	224878865	224879382	161	518	275	23	124.21	18.43	1.01		224803123	+	NM_001003665	C1orf95	76017	0	0	0
397	chr5	128338162	128338647	1152	486	169	19	124.09	19.06	1.01		128329111	+	NM_001017372	SLC27A6	9220	0	0	0
398	chr14	74249154	74249834	464	681	459	18	124.32	28.47	1.01		74249602	+	NM_015962	FCF1	11	1	0	1	1.26183	1.38691
399	chr10	106088117	106088679	231	563	168	16	124.61	33.96	1.01		106083653	-	NM_033397	ITPRIP	4632	0	0	1	1.8227	1.67419
400	chr3	188006583	188007420	1054	838	432	17	99.98	22.37	1.08		188006984	-	NM_002916	RFC4	31	1	1	1	1.29247	1.22892
401	chr5	138705022	138705855	1163	834	444	18	96.27	22.03	1.19		138705417	+	NM_016480	PAIP2	49	1	0	1	0.776136	0.801902
402	chr9	26882691	26883092	1427	402	162	14	97.05	18.88	1.21		26882725	-	NM_024828	C9orf82	128	1	0	1
403	chr4	148737442	148738355	1109	914	448	19	97.94	18.64	1.22		148757988	+	NM_018241	TMEM184C	-20098	0	0	0	0.658639	0.650002
404	chr1	78330855	78331278	62	424	253	12	97.82	24.91	1.22		78284176	+	NM_017655	GIPC2	46932	0	0	1
405	chr6	138212149	138212832	1274	684	220	19	98.1	15.25	1.23		138230273	+	NM_006290	TNFAIP3	-17904	0	0	1	0.656217	0.753295	1.74875	2.00745
406	chr5	159368492	159369142	1180	651	225	20	99.27	18.75	1.24		159368757	+	NM_003314	TTC1	-40	1	0	1
407	chr3	123617624	123618241	1021	618	384	16	99.07	16.95	1.24		123617572	-	NM_019069	WDR5B	436	1	0	1	0.736014	0.706635
408	chr9	75673967	75674472	1439	506	228	13	99.06	24.91	1.24		76302071	+	NM_006914	RORB	-627876	0	0	1
409	chr1	171358578	171359702	119	1125	719	29	99.5	8.32	1.25		171286726	-	NM_005092	TNFSF18	72571	0	0	1
410	chr19	11407124	11407755	693	632	306	15	99.82	26.44	1.26		11407268	+	NM_002743	PRKCSH	162	1	0	1	1.31542	1.35093
411	chr16	65210853	65211454	549	602	281	16	95.57	20.34	1.34		65196067	+	NM_181553	CMTM3	15067	0	0	0
412	chr4	54217622	54218119	1073	498	263	14	95.52	19.28	1.34		54152481	-	NM_001126328	LNX1	65404	0	0	0
413	chr2	54196342	54196738	804	397	238	12	95.66	20.34	1.34		54195913	+	NM_138448	ACYP2	667	1	1	1	1.21133	1.29819
414	chr13	100325820	100326563	420	744	448	17	95.66	20.34	1.35		100125104	-	NM_001079669	TMTC4	201164	0	0	0	0.647218	0.543258
415	chr15	88731876	88732627	518	752	359	15	95.7	29.43	1.35		88732476	+	NM_003870	IQGAP1	-241	0	1	0	0.737432	1.48867	0.55518
416	chr7	7646324	7647039	1299	716	442	18	96.16	14.53	1.36		7573140	+	NM_019005	MIOS	73626	1	0	1
417	chr4	57679830	57680592	1075	763	382	16	92.24	24.48	1.41		57671296	-	NM_001553	IGFBP7	8916	0	0	1	0.765237	0.765322
418	chr7	72786990	72787463	1316	474	154	12	92.04	22.64	1.41		72787334	+	NR_026690	WBSCR26	-190	1	1	1
419	chr12	102847623	102848237	378	615	366	14	93.31	25.01	1.43		102848119	-	NR_027249	LOC253724	-130	1	1	0
420	chr19	12582316	12582800	694	485	320	14	93.31	16.44	1.43		12582623	-	NM_020714	ZNF490	13	1	0	1	0.847088	0.826721
421	chr16	83123336	83123813	563	478	307	14	93.31	17.82	1.43		83095789	-	NM_020947	KIAA1609	27854	0	0	0	0.627359	0.6427
422	chr6	34832994	34833507	1238	514	299	14	93.67	19.28	1.44		34833289	+	NM_003093	SNRPC	4	1	0	1		1.22763
423	chr19	39434257	39434793	720	537	367	16	94.15	20.47	1.45		39437295	+	NM_014686	KIAA0355	-2671	0	1	0	1.38287	1.39596
424	chr5	68566083	68566799	1142	717	393	15	94.54	21.18	1.47		68566377	+	NM_001799	CDK7	99	1	1	1	0.857048
425	chr12	90696860	90697514	371	655	260	14	94.46	27.17	1.47		91063804	-	NM_001731	BTG1	-366684	0	0	1	1.34016	1.40629
426	chr19	52544037	52544801	748	765	339	16	94.65	24.91	1.48		52544385	+	NM_014681	DHX34	-9	1	0	1
427	chr1	9893388	9894074	6	687	342	15	94.66	12.2	1.48		9892903	-	NM_001012329	CTNNBIP1	827	0	1	0
428	chr19	3922142	3922503	684	362	163	11	94.61	22.64	1.48		3920826	-	NM_001348	DAPK3	1479	1	1	1	0.777518
429	chr6	31617361	31618224	1228	864	442	19	95.06	20.03	1.49		31618204	-	NM_004640	BAT1	-401	1	1	1
430	chr17	40580186	40580729	612	544	395	13	95.05	27.17	1.49		40580466	+	NM_006460	HEXIM1	115	0	1	0	0.648615	0.677275
431	chr19	19487603	19488144	716	542	412	13	95.25	20.38	1.5		19487539	+	NM_015965	NDUFA13	476	1	0	1	0.697233	0.734041
432	chr4	151421030	151421801	1114	772	329	18	90.86	14.53	1.54		151219529	+	NM_001040260	DCLK2	201830	0	0	0
433	chr8	140801337	140801936	1409	600	427	17	90.77	12.71	1.54		140784481	-	NM_016601	KCNK9	17283	0	1	0
434	chr14	50782555	50782982	444	428	168	12	87.81	15.06	1.58		50776635	+	NM_030755	TMX1	6088	0	0	0	0.832875	0.694261
435	chr2	150152026	150152906	840	881	164	17	87.97	14.23	1.59		150152576	-	NM_015702	MMADHC	-386	0	0	0
436	chr1	144218485	144219304	81	820	356	17	88.04	21.68	1.59		144218994	+	NM_005105	RBM8A	-153	1	0	1		0.800259	1.59863
437	chr17	4784226	4784874	569	649	321	17	88.04	19.8	1.59		4784374	+	NM_015528	RNF167	173	1	0	1
438	chr14	105028197	105028705	479	509	172	12	88.38	24.91	1.6		105028630	+	NM_001134876	C14orf80	-261	1	0	1
439	chr9	74948667	74948979	1438	313	157	11	88.42	16.95	1.6		74956600	+	NM_000700	ANXA1	-7776	0	0	1	0.812864	0.801871
440	chr1	40769557	40770098	36	542	255	15	88.58	17.43	1.61		40769819	+	NM_152373	ZNF684	-7	1	0	1
441	chr15	53398477	53399088	497	612	157	14	88.58	29.43	1.61		53398424	+	NM_004855	PIGB	210	1	0	1	0.770692	0.724692
442	chr8	141543577	141544162	1410	586	416	13	88.47	15.14	1.61		141537860	-	NM_031466	TRAPPC9	6133	1	0	1
443	chr1	154964335	154965281	101	947	498	23	89.04	11.77	1.62		154964886	+	NM_001142560	C1orf66	-53	1	0	1	1.22239	1.37162
444	chr10	13851907	13852408	190	502	246	12	89.09	22.64	1.63		13668944	+	NM_003675	PRPF18	183209	0	0	0
445	chr19	18529031	18529633	710	603	438	13	89.39	24.91	1.64		18529603	+	NM_024069	C19orf50	-134	1	1	1
446	chr1	159463560	159464544	108	985	492	27	89.69	8.33	1.65		159462456	+	NM_032174	TOMM40L	1596	0	1	0	0.625899	0.663163
447	chr1	167603467	167604454	115	988	385	23	90.01	11.3	1.66		167603817	+	NM_003666	BLZF1	35	1	0	1	1.39005	1.32162
448	chr1	11916822	11917311	10	490	323	12	90.33	24.91	1.67		11917332	+	NM_000302	PLOD1	-187	0	1	0
449	chr20	1253696	1254219	885	524	201	14	90.58	18.64	1.68		1257838	-	NM_080489	SDCBP2	-3941	0	0	1	1.18465
450	chr19	38359377	38359966	719	590	285	13	90.58	22.64	1.68		38377438	+	NM_002333	LRP3	-17776	1	0	1
451	chr5	140050950	140051666	1167	717	265	17	87.79	17.43	1.72		140051201	+	NM_012208	HARS2	14	1	0	1
452	chr19	59385228	59385849	759	622	242	13	87.7	15.85	1.72		59385478	-	NM_024298	MBOAT7	-8	0	0	0
453	chr1	116762348	116762813	77	466	171	13	87.65	15.25	1.72		116762704	-	NR_024126	C1orf203	-185	1	0	0	1.21782	1.26741
454	chr17	23385413	23385965	592	553	172	15	87.36	17.43	1.85		23393814	+	NM_016231	NLK	-8229	0	0	0	0.567894	0.603192
455	chr6	27095865	27096488	1213	624	207	14	87.53	24.91	1.85		27096064	-	NR_026776	LOC100270746	8	0	0	1
456	chr1	165368068	165368718	113	651	339	21	86.42	14.4	1.93		165330710	+	NM_001080426	DUSP27	37697	0	1	0
457	chr1	143641703	143642339	80	637	332	25	86.46	10.17	1.94		143643389	-	NM_001002811	PDE4DIP	-1354	0	0	0	0.75805	0.759399
458	chr5	139924316	139924706	1165	391	228	14	86.71	14.19	1.95		139924603	+	NM_080670	SLC35A4	-59	0	0	1
459	chr10	71657425	71657935	213	511	133	12	86.94	17.68	1.96		71663196	-	NM_021129	PPA1	-5638	0	0	0
460	chr14	23727800	23728144	432	345	168	12	86.9	16.45	1.96		23727964	-	NM_024658	IPO4	4	1	0	1
461	chr6	36961332	36961756	1242	425	274	11	86.89	20.38	1.96		36961617	+	NM_152734	C6orf89	-11	1	0	1
462	chr1	207849582	207850239	146	658	166	24	87.08	10.17	1.97		207823667	+	NM_020439	CAMK1G	26081	0	0	0
463	chr8	22661097	22661538	1361	442	162	12	87.12	19.18	1.97		22606760	-	NM_004430	EGR3	54499	0	0	0		0.569094	75.2333	44.7811
464	chr7	6712993	6713414	1297	422	237	11	87.23	20.38	1.98		6713091	-	NM_006956	ZNF12	139	1	0	1
465	chr4	144114937	144115367	1107	431	162	15	87.23	14.69	1.99		143987054	-	NM_003866	INPP4B	128045	0	0	0	0.798978
466	chr4	186043627	186044279	1126	653	325	17	85.14	17.79	2.26		185984209	-	NM_001995	ACSL1	59743	0	0	0
467	chr1	42920070	42920611	37	542	386	12	85.17	22.64	2.27		42920652	+	NM_004559	YBX1	-196	1	0	0
468	chr19	43556638	43557343	725	706	351	15	85.38	14.36	2.28		43557029	+	NM_002812	PSMD8	-40	1	1	1
469	chr12	115356606	115357219	388	614	447	15	85.38	17.17	2.28		115455609	+	NM_207436	FLJ42957	-98556	0	0	1
470	chr16	69114796	69115130	553	335	168	10	85.44	22.64	2.3		69114958	-	NM_015386	COG4	6	1	1	1	1.23021
471	chr1	49116818	49117451	46	634	331	14	85.68	18.83	2.32		49015134	-	NM_024603	BEND5	102015	0	0	0
472	chr17	20970562	20970998	590	437	196	11	85.56	18.11	2.32		20970849	+	NM_015510	DHRS7B	-91	1	0	1
473	chr20	60456372	60457130	928	759	363	14	85.93	18.11	2.33		60435984	-	NM_080833	C20orf151	20751	0	1	0
474	chr19	44113275	44113653	728	379	159	11	84.65	17.34	2.37		44113433	+	NM_021107	MRPS12	1	1	0	0	0.604222	0.639639
475	chr8	144434810	144435621	1415	812	440	21	83.45	14.23	2.42		144444933	+	NM_030895	ZNF696	-9683	1	0	1
476	chr14	22411550	22412006	429	457	168	11	83.43	20.38	2.42		22410799	+	NM_014045	LRP10	919	0	0	1	1.17586	1.34922
477	chr19	16467842	16468197	702	356	168	10	84.18	20.38	2.46		16468003	-	NM_145046	CALR3	7	1	0	1
478	chr11	26925550	26926487	262	938	633	25	84.2	12.02	2.47		26972203	+	NM_203371	FIBIN	-46020	0	0	0	0.456254	0.410512
479	chr19	44594699	44595065	731	367	164	10	82.84	20.38	2.51		44595589	+	NM_022835	PLEKHG2	-726	1	1	1
480	chr19	62524407	62524726	765	320	161	11	82.88	18.64	2.52		62523688	+	NM_213598	ZNF543	880	0	0	0
481	chr1	196893072	196893763	133	692	358	15	83.14	18.64	2.53		196874759	+	NM_080922	PTPRC	18671	0	0	1
482	chr2	74587883	74588521	817	639	471	14	83.15	23.6	2.54		74588329	-	NM_032673	PCGF1	25	1	0	1
483	chr3	41133705	41134209	989	505	343	14	82.24	15.53	2.74		41215945	+	NM_001098209	CTNNB1	-81897	0	1	1
484	chr11	65383085	65383776	283	692	415	16	81.97	14.53	2.98		65384447	+	NM_025128	MUS81	-947	1	1	1	1.29414	1.29111
485	chr7	75515015	75515467	1318	453	287	11	81.69	19.47	3.08		75515328	+	NM_005918	MDH2	-26	1	1	1	0.455776	0.474811
486	chr12	27224070	27224425	341	356	170	10	81.25	19.06	3.19		27288344	+	NM_015000	STK38L	-64104	0	1	0	0.59936	0.63617
487	chr5	131617869	131618637	1155	769	407	19	81.08	12.43	3.3		131621249	+	NM_001131027	PDLIM4	-2973	0	0	0
488	chr8	19584265	19584888	1357	624	268	14	80.58	16.95	3.38		19584541	-	NR_024040	CSGALNACT1	-8	0	0	0	0.685407	0.610655
489	chr10	112148909	112149779	232	871	417	19	80.6	15.25	3.39		112054697	-	NM_005871	SMNDC1	94629	0	0	0	0.571425	0.583574
490	chr1	243851281	243851832	177	552	384	16	80.39	15.82	3.61		243384909	+	NM_018012	KIF26B	466756	0	0	0
491	chr7	138675329	138675939	1348	611	163	12	79.11	22.64	4		138676436	+	NM_197964	C7orf55	-944	1	1	1
492	chr7	128481942	128482816	1340	875	496	21	78.84	15.82	4.08		128482434	-	NM_012470	TNPO3	4	1	0	1	1.58337	1.75233
493	chr1	174075592	174076384	123	793	582	20	78.91	10.17	4.08		173979375	-	NM_003285	TNR	96799	0	1	1
494	chr1	43410438	43410781	40	344	149	10	78.99	17.6	4.09		43410612	+	NM_152498	WDR65	-25	1	0	1
495	chr8	90840657	90841123	1383	467	165	12	78.05	16.95	4.37		90839109	+	NM_003821	RIPK2	1713	0	0	0	0.80699	0.690113
496	chr16	74156477	74156948	558	472	159	12	77.52	16.95	4.54		74157749	+	NM_007285	GABARAPL2	-1113	0	1	0
497	chr17	18158927	18159427	588	501	141	11	77.96	15.47	4.59		18159046	-	NM_004618	TOP3A	22	1	1	1
498	chr14	72847812	72848175	462	364	200	14	76.86	11.1	4.66		72773957	+	NM_173462	PAPLN	74055	0	0	0	1.16745	1.19963
499	chr12	91891393	91891805	372	413	254	10	76.62	19.89	4.75		91847238	-	NM_003566	EEA1	44409	0	0	0	0.846597	0.785166
500	chr10	70385503	70386178	211	676	382	14	76.09	16.95	4.81		70385897	+	NM_004728	DDX21	-12	1	0	1	0.799939	0.800686
501	chr5	172318854	172319383	1190	530	135	15	76.23	13.86	4.84		172318977	-	NR_026682	LOC100268168	12	1	0	0
502	chr2	17802168	17802597	779	430	157	10	75.91	20.38	4.91		17798894	+	NM_001130009	GEN1	3431	0	0	0	1.19324	1.22164
503	chr1	20860274	20860800	15	527	247	12	75.46	18.16	5.1		20860624	-	NM_005216	DDOST	-103	1	0	1	0.766953	0.749868
504	chr8	99126618	99127163	1387	546	380	11	75.06	18.11	5.16		99126949	-	NM_000989	RPL30	49	1	0	1
505	chr14	69303441	69303847	460	407	157	11	75.25	16.95	5.18		69303586	+	NM_006925	SFRS5	12	1	0	0	1.24912
506	chr1	154837848	154838257	99	410	163	13	74.65	15.29	5.68		154837894	-	NM_182679	GPATCH4	117	1	1	1	1.17498	1.32397	0.698247
507	chr13	99262573	99263066	418	494	172	12	74.65	13.39	5.7		99422179	-	NM_033132	ZIC5	-159434	0	0	0
508	chr5	180603390	180603781	1198	392	151	12	74.65	14.61	5.7		180603512	-	NM_006098	GNB2L1	29	1	0	1	1.23762	1.33303	0.73507
509	chr3	24381541	24382031	979	491	272	12	74.65	16.64	5.7		24511270	-	NM_001128176	THRB	-129457	0	0	0	0.511754	0.438868
510	chr3	25168026	25168402	980	377	156	12	74.65	14.05	5.7		25444757	+	NM_016152	RARB	-276575	0	0	0
511	chr8	109109120	109109507	1399	388	248	14	74.56	14.37	5.89		109165089	-	NM_178565	RSPO2	-55721	0	0	0
512	chr9	34691870	34692213	1433	344	212	9	74.46	18.11	6.03		34700147	-	NM_002989	CCL21	-8065	0	1	0
513	chr12	119360114	119360668	393	555	171	11	74.3	22.64	6.11		119360286	+	NM_004373	COX6A1	-1	1	1	1
514	chr6	89729876	89730239	1258	364	172	10	74.39	16.65	6.11		89730067	-	NM_003800	RNGTT	-19	1	0	1
515	chr20	61966693	61967145	931	453	314	10	73.65	18.11	6.52		61967033	+	NM_199362	TPD52L2	-26	1	0	1	1.20713	1.20921
516	chr12	6703206	6703711	331	506	239	12	74.06	15.25	6.6		6703481	+	NM_016319	COPS7A	-36	1	0	1	0.839703	0.843312
517	chr6	32156945	32157369	1232	425	276	10	73.53	16.95	6.61		32185129	-	NM_019105	TNXB	-27908	0	0	0
518	chr19	17391423	17391877	706	455	300	10	73.46	15.85	6.7		17391911	+	NM_138401	FAM125A	-188	1	0	1
519	chr12	113841116	113841603	385	488	151	12	72.66	14.3	7.63		113606352	-	NM_016569	TBX3	234915	0	0	0	2.30759	2.021
520	chr9	137936755	137937040	1464	286	144	9	72.78	15.25	7.67		137938826	-	NM_015447	CAMSAP1	-1927	0	0	0	1.23884
521	chr6	28300785	28301131	1222	347	182	10	72.65	15.25	7.72		28301051	+	NM_006299	ZNF193	-84	0	0	1	1.27063	1.28021
522	chr3	187100760	187101123	1053	364	196	9	72.44	18.11	7.95		187138618	-	NM_004593	TRA2B	-37662	0	0	1	0.520938	0.524347
523	chr17	77832992	77833420	650	429	233	10	72.24	16.6	8.28		77824862	-	NM_139062	CSNK1D	8363	0	0	1	1.39069	1.38152
524	chr1	220883755	220884571	155	817	413	17	72.26	13.04	8.3		220858066	+	NM_198551	MIA3	26102	1	0	1	1.36524	1.28413
525	chr5	169662563	169663079	1187	517	350	14	72.29	12.1	8.31		169657400	-	NM_005565	LCP2	5513	0	1	0
526	chr16	73836244	73836948	556	705	389	12	71.99	18.11	8.62		73843004	-	NM_014567	BCAR1	-6371	0	0	0
527	chr8	94836044	94836413	1386	370	169	9	71.79	18.11	8.65		94836247	+	NM_001142301	TMEM67	-34	1	0	0	1.28333
528	chr20	60841803	60842275	930	473	340	10	71.79	18.11	8.67		60810633	+	NM_002531	NTSR1	31510	1	0	1
529	chr8	124762336	124763140	1406	805	376	18	70.94	14.69	9.41		124734371	-	NM_001081675	KLHL38	28341	0	0	0

## Sheet: low confidence
rank	chr	start	end	length	summit	tags	(-)log10Pval	FoldEn	FDR(%)		TSS	strand	RefSeq_ID	Gene_Name
1	chr15	89470083	89470941	859	467	70	551.2	62.02	0		89570106	+	NM_014848	SV2B
2	chr2	44827623	44828327	705	463	36	325.14	59.81	0		45022540	+	NM_005413	SIX3
3	chr8	124298461	124299082	622	377	34	257.56	36.5	0		124284164	-	NR_024479	LOC100131726
4	chr4	84891555	84892081	527	353	33	323.12	51.8	0		84676676	+	NM_032717	AGPAT9
5	chr4	149792539	149793070	532	345	32	291.63	42.36	0		149583093	-	NM_000901	NR3C2
6	chr6	44092138	44092694	557	260	29	284.34	49.81	0		44076316	+	NM_153246	C6orf223
7	chr5	19350571	19351173	603	446	19	144.13	30.5	0.33		20017046	-	NM_004934	CDH18
8	chr2	217071604	217071922	319	160	14	145.43	31.7	0.33		217071764	+	NM_000998	RPL37A
9	chr7	100568539	100568784	246	124	11	145.43	24.91	0.33		100557098	+	NM_000602	SERPINE1
10	chr17	15871587	15872038	452	303	19	147.44	23.83	0.34		15843731	-	NM_001042698	ZSWIM7
11	chr11	8666782	8667310	529	332	18	146.5	27.54	0.34		8663561	+	NR_002977	SNORA45
12	chr11	119680271	119680774	504	334	18	147.09	34.57	0.34		119701225	+	NM_174926	TMEM136
13	chr9	137196179	137196908	730	294	20	148.02	33.96	0.35		137106923	+	NM_006334	OLFM1
14	chr5	149807558	149808644	1087	680	30	151.55	20.34	0.36		149809512	-	NM_001025071	RPS14
15	chr20	43919065	43919854	790	426	21	151.84	36.23	0.36		43919442	-	NM_183386	ACOT8
16	chr7	774139	774747	609	172	19	151.95	29.43	0.36		732863	+	NM_017802	HEATR2
17	chr4	151399103	151399576	474	279	18	151.8	30.5	0.36		151219529	+	NM_001040261	DCLK2
18	chr6	31728057	31728885	829	160	23	153.89	25.96	0.37		31728149	-	NM_001098534	BAT3
19	chr3	186623658	186624122	465	207	20	155.45	26.79	0.38		186563663	+	NM_004721	MAP3K13
20	chr7	98844224	98844729	506	346	18	155.04	31.7	0.38		98844536	+	NM_003910	BUD31
21	chr20	47431687	47432307	621	433	22	157.95	30.5	0.39		47532588	-	NM_004975	KCNB1
22	chr6	138415600	138416020	421	161	17	156.84	36.23	0.39		138470353	-	NM_022121	PERP
23	chr1	202097165	202097797	633	165	25	158.67	26.69	0.4		202097362	+	NM_003094	SNRPE
24	chr22	16436615	16436910	296	149	14	158.29	31.7	0.4		16423182	+	NM_031481	SLC25A18
25	chr5	40870837	40871585	749	259	24	160.71	22.03	0.41		40871144	-	NM_000997	RPL37
26	chr1	239338143	239338748	606	263	23	161.77	26.19	0.41		239587101	-	NM_002924	RGS7
27	chr2	172486847	172487461	615	357	20	162.44	29.43	0.42		172487203	+	NM_003642	HAT1
28	chr15	32304252	32304690	439	238	18	164.94	33.48	0.42		32304536	+	NM_016454	TMEM85
29	chr10	32276522	32277169	648	276	21	169.27	31.7	0.43		32257776	-	NM_018287	ARHGAP12
30	chr17	77685160	77685530	371	202	19	168.64	30.5	0.43		77649395	-	NM_004104	FASN
31	chr15	81445309	81446097	789	379	26	169.75	20.86	0.44		81445998	+	NM_031452	FAM103A1
32	chr3	130362282	130363248	967	429	32	182.04	22.74	0.49		130362719	-	NM_020701	ISY1
33	chr4	177082043	177082489	447	280	20	180.5	32.54	0.49		177160642	-	NM_201592	GPM6A
34	chr4	169566378	169566713	336	169	21	185.66	30.5	0.5		169638213	-	NM_001012967	DDX60L
35	chr6	14829025	14829608	584	368	23	188.2	31.28	0.53		15354505	+	NM_004973	JARID2
36	chr19	44032488	44033564	1077	419	22	134.51	22.64	0.58		44032457	-	NM_001533	HNRNPL
37	chr14	54935036	54935523	488	247	16	134.38	27.17	0.58		54948329	-	NM_014924	KIAA0831
38	chr15	58474142	58474630	489	167	16	134.24	33.96	0.58		58477477	-	NM_001002857	ANXA2
39	chr2	19922955	19923765	811	480	30	202.11	33.89	0.6		19965225	-	NM_001008237	TTC32
40	chr5	110102131	110102683	553	396	17	136.9	31.7	0.6		110102652	+	NM_138773	SLC25A46
41	chr16	67692131	67692944	814	462	27	203.29	49.81	0.61		67697660	+	NM_138612	HAS3
42	chr11	17142952	17143682	731	254	20	138.98	32.54	0.61		17147930	-	NM_002645	PIK3C2A
43	chr21	29313436	29313771	336	169	16	138.66	27.33	0.61		29313556	-	NM_016940	RWDD2B
44	chr11	35094169	35094881	713	311	29	205.82	33.34	0.62		35116992	+	NM_001001391	CD44
45	chr12	6668707	6669360	654	492	22	140.27	21.32	0.62		6668937	-	NM_001135734	ZNF384
46	chr8	101747762	101748210	449	245	21	140.56	21.46	0.62		101731069	-	NM_152628	SNX31
47	chr19	49131042	49131572	531	316	17	139.84	24.91	0.62		49121398	-	NM_003425	ZNF45
48	chr5	133730412	133731103	692	373	21	141.44	33.42	0.64		133730664	-	NM_001113575	CDKL3
49	chr17	55139295	55140139	845	472	25	143.15	21.79	0.65		55139644	+	NM_030938	TMEM49
50	chr3	180547831	180548347	517	350	17	141.79	31.7	0.65		180548173	+	NM_033540	MFN1
51	chr7	74995296	74995652	357	168	15	143.37	31.7	0.65		74995330	-	NM_001003686	PMS2L3
52	chr3	64180863	64181565	703	313	29	216.41	32.8	0.67		64186171	-	NM_198859	PRICKLE2
53	chr12	41971651	41972048	398	163	25	217.75	36.54	0.68		42231991	-	NM_025003	ADAMTS20
54	chr13	105606776	105607180	405	196	22	224.89	45.19	0.7		105985338	-	NM_004093	EFNB2
55	chr19	54646659	54647307	649	253	26	228.09	45.28	0.72		54646927	-	NM_017916	PIH1D1
56	chr4	99283162	99284026	865	479	19	102.04	15.25	0.74		99283414	-	NM_174952	C4orf37
57	chr3	151747113	151747795	683	342	17	101.5	16.95	0.74		151747263	+	NM_032025	EIF2A
58	chr11	10282142	10282625	484	323	13	101.53	20.38	0.74		10283217	+	NM_001124	ADM
59	chr17	74390635	74391198	564	309	15	103.29	19.18	0.75		74433067	-	NM_003255	TIMP2
60	chr11	57236164	57236634	471	267	13	103.05	22.64	0.75		57236249	-	NM_153450	MED19
61	chr2	24869211	24869604	394	246	13	102.73	20.71	0.75		24869755	-	NM_001013663	C2orf79
62	chr19	49360512	49361252	741	508	30	238.06	35.77	0.76		49361088	+	NM_015919	ZNF226
63	chr1	154977167	154977910	744	423	21	125.27	14.08	0.76		154977547	-	NM_145729	MRPL24
64	chr1	201880675	201881228	554	318	19	104.84	14.65	0.76		201862550	+	NM_001001396	ATP2B4
65	chr13	101907580	101908256	677	372	18	126.26	24.9	0.77		101852125	-	NM_175929	FGF14
66	chr3	130450983	130451280	298	150	11	104.98	23.3	0.77		130451142	+	NM_016128	COPG
67	chr6	43710858	43711848	991	677	26	127.57	21.79	0.78		43711554	+	NM_014628	MAD2L1BP
68	chr15	42742795	42743627	833	418	19	127.1	27.17	0.78		42743168	-	NM_025137	SPG11
69	chr2	220170749	220171613	865	443	17	105.19	20.38	0.78		220170839	+	NM_052902	STK11IP
70	chr19	44573632	44574157	526	241	17	127.23	24.48	0.78		44573802	+	NM_017592	MED29
71	chr16	67930826	67931470	645	264	15	105.26	24.91	0.78		67931046	+	NM_016101	NIP7
72	chr19	50680322	50680690	369	207	13	105.1	24.91	0.78		50688314	-	NM_206901	RTN2
73	chr6	159267571	159268022	452	137	13	105.36	24.91	0.78		159198652	-	NM_145303	OSTCL
74	chr9	81376311	81376932	622	415	17	128.43	29.43	0.79		81376697	+	NM_007005	TLE4
75	chr2	132821202	132821739	538	338	14	106.07	27.17	0.79		132890616	+	NM_001508	GPR39
76	chr7	116102040	116102455	416	166	13	106.28	23.3	0.79		116099694	+	NM_001127500	MET
77	chr6	27692731	27693571	841	376	21	107.39	24.23	0.8		27548876	-	NM_007149	ZNF184
78	chr7	107722284	107722675	392	172	17	129.71	18.88	0.8		107584318	-	NM_001037133	NRCAM
79	chr20	16658210	16658849	640	459	17	107.15	17.23	0.8		16658628	+	NM_003092	SNRPB2
80	chr17	53282217	53282800	584	242	16	107.33	23.6	0.8		53282398	-	NM_016070	MRPS23
81	chr11	8660678	8660993	316	159	13	128.74	27.54	0.8		8660570	+	NM_000990	RPL27A
82	chr5	150060592	150061195	604	314	18	108.37	18.88	0.81		150060817	-	NM_018047	RBM22
83	chr1	37792330	37792669	340	171	14	130.04	30.29	0.81		37792490	-	NM_024700	SNIP1
84	chr2	178125669	178126162	494	143	14	108.44	21.63	0.81		178125770	-	NM_152517	TTC30B
85	chr10	27208672	27209105	434	168	13	107.65	27.17	0.81		27189965	-	NM_001012751	ABI1
86	chr19	60858561	60858893	333	167	12	108.5	27.17	0.81		60857227	+	NM_007279	U2AF2
87	chr10	32195224	32195510	287	144	10	108.5	22.64	0.81		32257776	-	NM_018287	ARHGAP12
88	chr9	138141203	138141454	252	127	9	108.5	20.38	0.81		138150552	-	NM_152833	C9orf69
89	chr7	102301719	102302163	445	279	16	108.69	18.36	0.82		102340687	+	NM_005824	LRRC17
90	chr22	30221917	30222343	427	259	13	108.56	20.38	0.82		30222260	+	NM_014775	SFI1
91	chr12	3196757	3197413	657	250	20	109.6	22.88	0.83		3056817	+	NM_006675	TSPAN9
92	chr14	72152150	72152808	659	214	20	131.56	21.78	0.83		72430562	-	NM_012074	DPF3
93	chr7	38861977	38862562	586	186	20	131.56	22.34	0.83		38915325	-	NM_080631	VPS41
94	chr10	3746709	3747172	464	279	15	108.81	22.4	0.83		3817455	-	NM_001300	KLF6
95	chr16	86356920	86357339	420	168	13	109.5	24.91	0.83		86357043	-	NM_017566	KLHDC4
96	chr6	6770438	6771207	770	338	22	131.57	18.79	0.84		6568058	-	NR_026970	LOC285780
97	chr1	25438721	25439658	938	265	22	131.57	19.07	0.84		25431600	-	NM_207170	SYF2
98	chr3	140657324	140657762	439	271	16	131.58	25.42	0.84		140678042	-	NM_004164	RBP2
99	chr13	98951451	98951862	412	257	13	110.58	27.17	0.84		98951728	+	NM_004800	TM9SF2
100	chr19	63508035	63508767	733	411	19	131.9	23.3	0.85		63530196	+	NM_181846	ZSCAN22
101	chr1	29376633	29377140	508	272	16	131.62	27.17	0.85		29381224	-	NM_005626	SFRS4
102	chr15	72540261	72540876	616	396	16	111.31	24.4	0.85		72540582	-	NM_201265	UBL7
103	chr4	13554757	13555106	350	184	14	132.13	29.43	0.85		13238426	-	NM_148894	BOD1L
104	chr1	208067700	208068393	694	239	22	132.86	18.62	0.86		208067955	+	NM_014388	C1orf107
105	chr7	135042797	135043423	627	244	18	112.41	19.13	0.86		135063473	-	NM_012450	SLC13A4
106	chr1	54731624	54732362	739	381	18	112.41	26.3	0.86		54786488	+	NM_147161	ACOT11
107	chr6	72368891	72369385	495	239	16	113.07	16.78	0.86		72187169	-	NR_026807	C6orf155
108	chr2	121671787	121672126	340	171	13	113.27	25.92	0.87		121759248	-	NM_014553	TFCP2L1
109	chr19	32976353	32977578	1226	442	23	114.45	24.91	0.88		34395976	-	NM_006003	UQCRFS1
110	chr11	12064176	12065061	886	722	20	113.55	12.61	0.88		12088713	+	NM_014632	MICAL2
111	chr1	100371009	100371692	684	265	17	114.06	18.3	0.88		100371306	+	NM_019083	CCDC76
112	chr22	35704034	35704502	469	175	14	114.29	22.64	0.88		35733785	-	NM_178552	C22orf33
113	chr18	46419049	46419688	640	370	17	114.64	19.18	0.89		46340481	+	NM_002747	MAPK4
114	chrX	67691519	67692100	582	278	16	115.11	24.4	0.89		67635610	+	NM_173834	YIPF6
115	chr3	33049516	33049773	258	130	11	115.16	18.64	0.89		33113297	-	NM_001039770	TMPPE
116	chr8	131076311	131077138	828	388	23	115.37	20.34	0.9		131021182	-	NM_016623	FAM49B
117	chr1	4965512	4966163	652	286	22	115.71	16.57	0.9		4614964	+	NM_018836	AJAP1
118	chr8	144726649	144727109	461	274	15	115.33	24.91	0.9		144726071	-	NM_001100878	C8orf73
119	chr16	4912712	4913172	461	254	14	115.33	24.91	0.9		4927137	-	NM_002705	PPL
120	chr14	90180908	90181550	643	297	16	100.99	21.79	0.91		90352514	-	NM_001010854	TTC7B
121	chr19	57384533	57385073	541	374	15	116.4	20.38	0.91		57385002	+	NM_014225	PPP2R1A
122	chr6	31741444	31741747	304	153	11	100.78	21.51	0.91		31741635	+	NM_001320	CSNK2B
123	chr10	112247333	112247749	417	276	16	117.8	26.76	0.92		112247614	+	NM_004419	DUSP5
124	chr2	20885985	20886602	618	346	15	101.21	18.3	0.92		20886308	-	NM_021925	C2orf43
125	chr12	48791665	48792202	538	297	15	116.75	29.43	0.92		48792166	+	NM_032901	C12orf62
126	chr19	12765241	12765822	582	222	14	101.4	27.17	0.92		12763309	+	NM_002229	JUNB
127	chr5	79739190	79739637	448	248	14	117.06	24.91	0.92		79739593	+	NM_001105251	ZFYVE16
128	chr17	43263506	43264408	903	456	19	118.97	33.16	0.93		43263902	-	NM_145255	MRPL10
129	chr5	121325311	121325824	514	162	18	118.13	22.59	0.93		121325554	+	NM_152546	SRFBP1
130	chr1	20706541	20707044	504	346	15	120.94	22.64	0.95		20707261	-	NM_024544	MUL1
131	chr7	136681022	136681440	419	166	14	121.12	27.17	0.95		136679086	-	NM_002825	PTN
132	chr11	64996020	64996517	498	162	16	121.71	27.17	0.96		65021808	+	NR_002819	MALAT1
133	chr7	154426500	154426975	476	210	19	121.88	19.36	0.97		154425615	-	NM_007349	PAXIP1
134	chr5	16956851	16957563	713	441	21	122.62	20.34	0.98		16989385	-	NM_012334	MYO10
135	chr12	111962683	111963342	660	329	19	122.66	25.42	0.99		111980044	+	NM_004416	DTX1
136	chr6	22095590	22096139	550	171	16	123.1	25.96	0.99		22405709	-	NM_000948	PRL
137	chr9	111129565	111130045	481	272	17	123.33	16.3	1		111122842	-	NM_018424	EPB41L4B
138	chr9	130916767	130917367	601	276	17	123.21	22.37	1		130913433	+	NM_178001	PPP2R4
139	chr15	32181325	32181909	585	203	17	123.33	25.77	1		32181565	+	NM_152595	PGBD4
140	chr6	10802526	10803227	702	308	15	99.97	27.17	1.08		10802825	-	NM_001145020	C6orf52
141	chr18	69760432	69761144	713	259	18	96.33	14.5	1.19		69965979	-	NM_152676	FBXO15
142	chr17	24012918	24013500	583	252	16	96.66	12.32	1.2		24013060	-	NM_006923	SDF2
143	chr22	49086212	49087066	855	375	16	96.8	18.11	1.2		49075336	-	NM_012401	PLXNB2
144	chr1	9093259	9093786	528	150	13	96.7	24.91	1.2		9111816	-	NM_024980	GPR157
145	chr7	108011974	108012319	346	177	11	96.8	22.64	1.2		107997591	+	NM_012328	DNAJB9
146	chr20	3088394	3088722	329	165	11	96.8	24.91	1.2		3088540	-	NM_014948	UBOX5
147	chr16	14371086	14371428	343	172	11	96.8	24.91	1.2		14631621	-	NM_001134477	PARN
148	chr17	76883584	76883892	309	155	10	96.8	22.64	1.2		76883691	-	NM_001037984	SLC38A10
149	chr19	12582986	12583508	523	344	14	97.22	22.64	1.21		12582731	+	NM_153358	ZNF791
150	chr20	48362773	48363223	451	240	15	97.42	16.4	1.22		48240782	+	NM_005194	CEBPB
151	chr9	116121279	116121798	520	171	13	97.54	20.38	1.22		116125123	+	NM_000607	ORM1
152	chr6	27221662	27222043	382	196	12	97.66	20.34	1.22		27222598	-	NM_080593	HIST1H2BK
153	chr9	128968782	128969621	840	454	21	98.25	16.52	1.23		128924865	-	NM_012098	ANGPTL2
154	chr1	32888475	32889191	717	296	17	98.18	20.34	1.23		32888772	-	NM_178547	ZBTB8OS
155	chr4	153920167	153920918	752	393	16	98.16	20.34	1.23		153920561	+	NM_014447	ARFIP1
156	chr6	36950453	36951027	575	158	14	98.19	21.18	1.23		36950778	-	NM_016059	PPIL1
157	chr2	148494710	148495122	413	162	12	99.19	22.64	1.24		148494789	-	NM_181741	ORC4L
158	chr1	173200000	173200524	525	364	20	99.27	16.01	1.25		173235193	+	NM_001007214	CACYBP
159	chr16	4126224	4126808	585	403	20	99.27	15.86	1.25		4106187	-	NM_001116	ADCY9
160	chr15	70765396	70766009	614	204	16	99.49	18.64	1.25		70765578	+	NM_033028	BBS4
161	chr2	70373789	70374609	821	441	16	99.44	18.11	1.25		70374373	-	NM_003096	SNRPG
162	chr19	11063292	11064106	815	439	16	99.92	24.91	1.26		11061056	+	NM_000527	LDLR
163	chr6	91177668	91178274	607	436	15	99.89	23.46	1.26		91063283	-	NM_021813	BACH2
164	chr19	39955854	39956221	368	169	12	95.27	20.58	1.33		39955974	-	NM_001007248	ZNF599
165	chr7	92163218	92163578	361	170	12	95.27	20.19	1.33		92057642	-	NM_152789	FAM133B
166	chr3	13468277	13468718	442	161	12	95.66	24.91	1.34		13496838	+	NM_024827	HDAC11
167	chr9	103335636	103336353	718	310	15	95.75	23.8	1.35		103335953	+	NM_019592	RNF20
168	chr2	70676736	70677486	751	399	15	95.79	22.64	1.36		70634613	-	NM_001099691	TGFA
169	chr1	199130220	199130838	619	331	18	91.91	18.92	1.4		199130621	+	NM_001142569	C1orf106
170	chr11	89595744	89596412	669	290	14	91.83	17.68	1.4		89596180	-	NM_001144073	CHORDC1
171	chr18	70415702	70416176	475	297	12	91.93	20.38	1.4		70416051	-	NR_024484	LOC400657
172	chr20	38694769	38695005	237	119	8	91.6	16.27	1.4		38751290	-	NM_005461	MAFB
173	chr10	101978987	101979781	795	464	16	92.03	21.51	1.41		101979334	-	NM_001278	CHUK
174	chr12	115146267	115146740	474	312	12	92.04	18.11	1.41		115199374	-	NM_015335	MED13L
175	chr1	224660514	224661417	904	563	26	92.76	9.32	1.42		224662424	-	NM_001618	PARP1
176	chr8	30721007	30721671	665	503	17	92.83	13.07	1.42		30721231	+	NM_005671	UBXN8
177	chr3	140545190	140545932	743	299	17	92.46	19.37	1.42		140545550	+	NM_020191	MRPS22
178	chr19	3713454	3714125	672	243	14	92.96	18.11	1.42		3713664	+	NM_172251	MRPL54
179	chr6	24023685	24024254	570	245	13	92.47	24.91	1.42		24234392	+	NM_080723	NRSN1
180	chr19	19366444	19367018	575	410	14	93.31	21.44	1.43		19357641	+	NM_017660	GATAD2A
181	chr19	18450695	18451096	402	152	14	93.31	16.35	1.43		18409943	-	NM_016368	ISYNA1
182	chr1	38228095	38228655	561	256	13	93.35	20.38	1.44		38228348	-	NM_006802	SF3A3
183	chr19	7020305	7020864	560	369	13	93.45	18.11	1.44		7020470	+	NM_001044388	ZNF557
184	chr1	240655010	240655542	533	372	18	93.97	11.53	1.45		240754621	-	NM_152666	PLD5
185	chr4	143231707	143232360	654	216	16	94.15	16.62	1.45		142777203	+	NM_000585	IL15
186	chr1	153544765	153545370	606	282	16	94.15	15.4	1.45		153545162	+	NM_001135822	FDPS
187	chr2	37164875	37165294	420	262	12	93.78	22.83	1.45		37165097	+	NM_174931	CCDC75
188	chr3	130321971	130322427	457	308	12	93.93	15.85	1.45		130323309	-	NM_198490	RAB43
189	chr20	44819968	44820719	752	323	16	94.38	21.1	1.46		44771685	+	NM_030777	SLC2A10
190	chr12	8070145	8070696	552	399	13	94.24	20.38	1.46		8076625	+	NM_018416	FOXJ2
191	chr2	151052344	151052696	353	168	13	94.42	17.43	1.47		151052426	-	NM_005168	RND3
192	chr3	88190835	88191129	295	148	10	94.59	21.63	1.47		88190836	-	NM_001008390	CGGBP1
193	chr20	10930423	10930783	361	149	11	94.64	22.59	1.48		10602694	-	NM_000214	JAG1
194	chr11	18504659	18505310	652	485	14	94.73	24.91	1.49		18505065	-	NM_006292	TSG101
195	chr10	12864492	12864851	360	198	11	94.78	22.59	1.49		13083710	-	NM_031455	CCDC3
196	chr3	98965947	98966593	647	335	14	95.17	24.91	1.5		98966284	+	NM_177976	ARL6
197	chr9	111251358	111251846	489	322	14	90.85	19.06	1.54		111253485	-	NM_001145369	PTPN3
198	chr22	31279669	31280142	474	303	12	90.8	19.89	1.54		31201223	+	NM_001033024	FBXO7
199	chr5	169076781	169077300	520	170	17	90.99	13.26	1.55		168996828	+	NM_004946	DOCK2
200	chr20	24921355	24921841	487	183	14	91.09	17.48	1.55		24921425	-	NM_020531	C20orf3
201	chr6	2468297	2468808	512	259	12	88.07	18.11	1.59		2580297	-	NM_152554	C6orf195
202	chr11	107598337	107599397	1061	639	22	88.16	15.53	1.6		107598768	+	NM_000051	ATM
203	chr10	71018061	71018521	461	296	13	88.23	20.34	1.6		71003128	-	NM_020999	NEUROG3
204	chr19	55072459	55073070	612	265	14	88.58	22.64	1.61		55072640	+	NM_024682	TBC1D17
205	chr19	17919089	17919595	507	339	12	88.58	20.38	1.61		17923110	+	NM_002248	KCNN1
206	chr5	169613654	169614342	689	274	19	88.94	14.69	1.62		169592527	+	NM_001102609	LOC133874
207	chr16	3390909	3391170	262	132	9	88.8	17.27	1.62		3391026	-	NM_017810	ZNF434
208	chr7	23601100	23601705	606	228	13	89.12	22.64	1.63		23603522	+	NM_138771	CCDC126
209	chr7	100377743	100378244	502	206	12	89.09	18.11	1.63		100331477	-	NM_000665	ACHE
210	chr11	57054555	57055211	657	261	18	89.39	14.53	1.64		57054808	-	NM_012456	TIMM10
211	chr6	53827466	53828002	537	387	16	89.56	17.79	1.64		53767736	+	NM_018214	LRRC1
212	chr2	43118688	43119184	497	223	12	89.6	22.64	1.64		43307249	-	NM_006887	ZFP36L2
213	chr5	168072005	168072580	576	316	21	89.71	14.08	1.65		167939166	-	NM_024594	PANK3
214	chr14	64450528	64451317	790	359	16	90.01	16.95	1.66		64450892	+	NM_145165	CHURC1
215	chr3	9766245	9766759	515	367	13	90	19.55	1.66		9766627	+	NM_002542	OGG1
216	chr8	107101989	107102503	515	200	13	90	15.64	1.66		107351648	+	NM_018002	OXR1
217	chr15	63948594	63948973	380	215	13	90.37	17.43	1.67		63948849	+	NM_004663	RAB11A
218	chr3	49456469	49456865	397	229	11	90.15	18.11	1.67		49441761	-	NM_032316	NICN1
219	chr17	45805343	45806031	689	250	17	90.45	17.43	1.68		45805588	+	NM_152463	EME1
220	chr16	71256334	71256780	447	209	12	90.57	18.68	1.68		71639775	-	NM_006885	ZFHX3
221	chr3	122747257	122748025	769	329	15	87.77	18.3	1.72		122747543	-	NM_199420	POLQ
222	chr5	173819473	173820024	552	154	15	87.47	17.43	1.85		174084180	+	NM_002449	MSX2
223	chr2	9481035	9481435	401	157	11	87.49	21.63	1.85		9481094	-	NM_022334	ITGB1BP1
224	chr19	63775690	63776427	738	397	14	87.54	15.85	1.86		63776754	-	NM_198055	MZF1
225	chr9	34600063	34600862	800	508	19	86.66	15.25	1.94		34602101	-	NM_148179	C9orf23
226	chr6	27548420	27549271	852	438	17	86.57	16.95	1.94		27548876	-	NM_007149	ZNF184
227	chr21	41752804	41753230	427	165	11	86.66	15.85	1.94		41719847	+	NM_002462	MX1
228	chr1	117690535	117691060	526	261	12	86.69	15.85	1.95		117711607	+	NM_006699	MAN1A2
229	chr17	2186336	2186861	526	256	12	86.69	20.38	1.95		2187428	-	NM_018128	TSR1
230	chr17	46893810	46894429	620	348	16	87.12	14.12	1.97		46692895	+	NM_016001	UTP18
231	chr7	30099542	30100182	641	473	14	87.21	13.69	1.97		30141076	+	NM_152793	C7orf41
232	chr12	93480637	93481048	412	242	11	87.22	19.89	1.98		93568455	-	NM_020698	TMCC3
233	chr3	140591071	140591419	349	136	10	85.06	20.38	2.25		140591212	-	NR_023350	COPB2
234	chr12	6259186	6259761	576	421	14	85.14	15.25	2.26		6289862	+	NM_018173	PLEKHG6
235	chr2	234374592	234375088	497	332	13	85.06	18.96	2.26		234333657	+	NM_000463	UGT1A1
236	chr5	140680167	140680982	816	437	19	85.24	11.44	2.27		140680535	-	NM_005642	TAF7
237	chr16	2857876	2858417	542	316	12	85.17	20.38	2.27		2848172	-	NM_022119	PRSS22
238	chr10	120863256	120863741	486	316	15	85.38	17.3	2.28		120853618	+	NM_018472	FAM45B
239	chr10	28825356	28826091	736	468	15	85.38	16.84	2.28		28861432	+	NR_024557	WAC
240	chr22	37480143	37480898	756	401	15	85.38	21.14	2.28		37481893	-	NM_015374	UNC84B
241	chr12	94020880	94021491	612	427	15	85.38	17.11	2.28		93991535	-	NM_001127362	NR2C1
242	chr3	48676457	48676749	293	147	9	85.44	20.38	2.3		48675352	-	NM_001407	CELSR3
243	chr2	54121812	54122117	306	154	9	85.44	20.38	2.3		54051481	-	NM_014614	PSME4
244	chr7	44206901	44207201	301	151	9	85.44	20.38	2.3		44207102	+	NM_006555	YKT6
245	chr17	10541428	10541738	311	156	9	85.44	20.38	2.3		10541610	-	NM_004589	SCO1
246	chr19	62972452	62972990	539	169	12	85.45	13.58	2.31		62972836	+	NM_017652	ZNF586
247	chr8	17824201	17824734	534	301	12	85.92	15.85	2.33		17824645	+	NM_006197	PCM1
248	chr12	132123755	132124042	288	145	10	85.82	14.64	2.33		132123950	+	NM_003428	ZNF84
249	chr3	195758112	195758917	806	465	19	86.12	10.17	2.34		195835402	-	NM_001011655	TMEM44
250	chr1	149638448	149638775	328	165	11	86.17	19.97	2.34		149638664	+	NM_002796	PSMB4
251	chr12	1973472	1973800	329	165	11	86.17	19.97	2.34		1983938	-	NM_152640	DCP1B
252	chr9	130683932	130684285	354	188	10	84.43	20.38	2.35		130684175	-	NM_004059	CCBL1
253	chr17	34648272	34648820	549	296	12	84.51	18.11	2.36		34635500	-	NM_198993	STAC2
254	chr15	73447383	73447619	237	119	8	84.49	14.02	2.36		73447994	-	NM_006715	MAN2C1
255	chr2	231357659	231358272	614	369	15	84.59	18.49	2.37		231286506	+	NM_001130849	CAB39
256	chr2	183696991	183697571	581	419	14	84.64	16.95	2.37		183697327	+	NM_138285	NUP35
257	chr14	76569270	76569621	352	144	10	84.68	20.38	2.37		76564787	-	NM_024496	C14orf4
258	chr7	133981565	133982257	693	458	14	84.99	14.23	2.38		133982070	+	NM_001724	BPGM
259	chr3	86925588	86926077	490	276	12	84.83	20.34	2.38		87122947	-	NM_016206	VGLL3
260	chr7	98935667	98936029	363	171	10	83.32	18.11	2.41		98935813	-	NM_032164	ZNF394
261	chr2	201461845	201462436	592	435	16	83.38	13.98	2.42		201462294	+	NM_001142355	NIF3L1
262	chr6	30238742	30239393	652	210	18	83.61	16.57	2.43		30238961	+	NM_033229	TRIM15
263	chr14	22127791	22128579	789	421	14	83.6	18.08	2.43		22127983	-	NM_001344	DAD1
264	chr14	68487526	68487939	414	167	14	83.83	15.43	2.43		68515836	-	NM_001130005	ACTN1
265	chr9	33146758	33147116	359	201	13	83.83	14.6	2.43		33157356	-	NM_001497	B4GALT1
266	chr12	56167875	56168331	457	164	13	83.83	17.04	2.43		56168117	+	NM_004990	MARS
267	chr19	13123577	13124135	559	198	13	83.83	13.26	2.43		13122281	+	NM_004907	IER2
268	chr18	41635266	41635777	512	270	13	83.83	17.35	2.43		41659542	+	NM_213602	SIGLEC15
269	chr15	36148317	36149105	789	451	16	83.85	27.37	2.45		36014748	+	NM_152453	TMCO5A
270	chr17	27177349	27178016	668	284	13	83.83	18.11	2.45		27210439	-	NM_018405	C17orf79
271	chr2	96797603	96798278	676	390	14	84.17	19.55	2.46		96790365	+	NM_020184	CNNM4
272	chr1	229927368	229928321	954	490	25	84.32	7.53	2.47		230020886	-	NR_002227	DISC2
273	chr19	47111978	47112528	551	396	12	84.33	20.38	2.48		47080285	+	NM_199002	ARHGEF1
274	chr11	103155189	103155480	292	147	9	84.38	19.89	2.48		#VALUE!	+	NM_001001711	DDI1
275	chr3	51950995	51951360	366	216	10	82.87	20.34	2.51		51951400	+	NM_001003935	PARP3
276	chr5	131920057	131920601	545	364	13	82.91	18.16	2.52		131920528	+	NM_005732	RAD50
277	chr14	101852907	101853149	243	122	8	82.88	13.56	2.52		101855848	+	NM_018335	ZNF839
278	chr5	130534044	130534572	529	311	16	83.05	13.56	2.53		130534539	+	NM_181705	LYRM7
279	chr17	15493694	15494487	794	360	16	83.01	13.56	2.53		15463743	-	NM_006382	CDRT1
280	chr16	4605935	4606612	678	375	13	83.03	20.38	2.53		4604928	-	NM_145253	FAM100A
281	chrX	42881357	42881929	573	158	12	82.34	15.85	2.62		42522430	-	NR_002191	PPP1R2P9
282	chr6	109081733	109082508	776	352	16	82.39	14.76	2.63		108988761	+	NM_001455	FOXO3
283	chr19	1430190	1430758	569	152	12	82.7	18.11	2.63		1430228	-	NM_152482	C19orf25
284	chr12	48850235	48850702	468	299	11	82.3	18.11	2.75		48847364	-	NM_147190	LASS5
285	chr2	53642855	53643543	689	443	13	82.06	20.34	2.86		53848432	+	NM_001008708	CHAC2
286	chr17	40556727	40557196	470	326	11	82.1	18.11	2.86		40565417	-	NM_133373	PLCD3
287	chr4	77971031	77971734	704	296	14	81.86	15.64	2.97		78038026	-	NM_001029870	ANKRD56
288	chr19	49403164	49403855	692	240	13	81.93	18.11	2.97		49408530	+	NM_182490	ZNF227
289	chr2	218970914	218971386	473	172	11	81.8	18.11	2.97		218972721	+	NM_021198	CTDSP1
290	chr1	243321585	243322526	942	493	24	81.58	10.8	3.07		243384909	+	NM_018012	KIF26B
291	chr12	12925357	12925733	377	151	10	81.66	20.38	3.08		12919677	+	NR_003932	RPL13AP20
292	chr11	14164754	14165647	894	729	16	81.16	12.71	3.18		14336607	-	NM_001102669	RRAS2
293	chr20	19980785	19981261	477	313	11	81.4	22.64	3.19		19981195	+	NM_015585	C20orf26
294	chr6	27095251	27095732	482	322	11	80.91	20.38	3.28		27096064	-	NR_026776	LOC100270746
295	chr4	15292068	15292687	620	461	14	80.95	15.25	3.29		15292449	+	NM_001145191	LOC285550
296	chr19	16169345	16169825	481	279	11	81	20.38	3.3		16169664	+	NM_032493	AP1M1
297	chr1	205202830	205203598	769	480	20	80.58	13.22	3.38		205210593	-	NM_001122980	FCAMR
298	chr12	6950021	6950713	693	316	14	80.61	13.18	3.39		6950204	+	NM_006331	EMG1
299	chr11	62146056	62146441	386	160	10	80.62	15.85	3.4		62146024	-	NM_012200	B3GAT3
300	chr15	63264875	63265264	390	172	10	80.17	20.38	3.59		63264616	-	NM_006660	CLPX
301	chr8	38744843	38745595	753	404	14	80.27	20.34	3.6		38763878	+	NM_001122824	TACC1
302	chr15	89366475	89366962	488	330	11	80.32	18.11	3.61		89366837	-	NM_018668	VPS33B
303	chr2	27047650	27048096	447	170	11	79.4	16.27	3.78		27047028	+	NM_012326	MAPRE3
304	chr9	78439024	78439419	396	242	10	79.5	20.38	3.78		78569173	+	NR_015342	PCA3
305	chr19	62566079	62566799	721	412	13	79.74	15.85	3.79		62566690	+	NR_002166	TRAPPC2P1
306	chr15	91373678	91374170	493	144	11	79.75	22.59	3.79		91433437	-	NM_020211	RGMA
307	chr18	43135010	43135706	697	238	16	79.99	9.92	3.8		42956743	-	NM_016097	IER3IP1
308	chr5	171681360	171681974	615	469	16	79.99	15.01	3.8		171643400	-	NM_152277	UBTD2
309	chr2	227223012	227223539	528	272	16	79.99	12.88	3.8		227371750	-	NM_005544	IRS1
310	chr2	206348539	206349097	559	158	16	79.99	15.91	3.8		206255468	+	NM_201267	NRP2
311	chr19	60391777	60392316	540	274	12	79.92	14.23	3.8		60383532	-	NM_003180	SYT5
312	chr6	157546812	157547306	495	348	13	79.26	13.86	4		157722544	+	NM_153746	ZDHHC14
313	chr3	28258492	28259153	662	404	13	78.56	16.27	4.05		28258127	+	NM_182523	CMC1
314	chr15	61427518	61428156	639	295	16	78.61	16.52	4.06		61461128	-	NM_001218	CA12
315	chr8	59486020	59486525	506	239	11	78.62	18.11	4.06		59486376	+	NM_001077619	UBXN2B
316	chr1	242990221	242990788	568	423	13	78.81	10.52	4.07		243065261	+	NM_198076	FAM36A
317	chr12	56616104	56616480	377	222	11	78.83	16.95	4.07		56621711	+	NM_033276	XRCC6BP1
318	chr15	53977198	53977516	319	160	10	78.99	19.55	4.09		53996621	-	NM_198400	NEDD4
319	chr6	150656295	150656602	308	155	9	78.99	17.6	4.09		150731720	+	NM_203395	IYD
320	chr11	6997833	6998334	502	340	11	78.99	20.38	4.11		6998162	-	NM_013249	ZNF214
321	chr17	25714754	25715262	509	340	11	78.34	18.11	4.16		25730109	+	NM_001304	CPD
322	chr19	5385101	5385610	510	354	11	78.25	13.58	4.16		5406425	+	NM_181710	ZNRF4
323	chr1	154093355	154093913	559	287	14	78.1	15.98	4.38		154093596	-	NM_001037533	GON4L
324	chr11	1566900	1567418	519	366	11	77.43	20.38	4.52		1563089	-	NM_001005922	KRTAP5-1
325	chr17	59258039	59258391	353	193	11	77.45	15.41	4.54		59258541	+	NM_002805	PSMC5
326	chr3	130434881	130435446	566	398	12	77.56	16.27	4.55		130451142	+	NM_016128	COPG
327	chr6	153365469	153365872	404	153	12	77.59	15.98	4.55		153365618	-	NM_001114184	MTRF1L
328	chr15	41879748	41880217	470	300	12	77.73	15.25	4.57		41879912	+	NM_016400	HYPK
329	chr17	34162100	34162662	563	310	12	77.82	18.3	4.57		34162527	+	NM_002795	PSMB3
330	chr8	37049805	37050273	469	338	12	77.84	16.95	4.58		36865154	+	NM_021631	FKSG2
331	chr22	45537019	45537318	300	151	10	77.91	15.25	4.59		45537212	+	NM_014346	TBC1D22A
332	chr8	101563461	101564613	1153	373	22	77.06	11.62	4.6		101641188	-	NM_198401	ANKRD46
333	chr19	60857422	60857944	523	165	11	77.07	13.58	4.6		60857227	+	NM_007279	U2AF2
334	chrX	71290207	71290842	636	168	12	77.1	15.85	4.61		71280758	+	NM_207422	FLJ44635
335	chr2	238859030	238859793	764	396	15	77.25	20.34	4.62		238861946	-	NM_022817	PER2
336	chr1	49536101	49536658	558	334	12	77.28	11.96	4.62		49015134	-	NM_024603	BEND5
337	chr20	48333902	48334466	565	242	13	77.29	16.95	4.63		48240782	+	NM_005194	CEBPB
338	chr3	15652642	15652939	298	150	9	77.34	16.95	4.63		15618258	+	NM_000060	BTD
339	chr7	156793329	156793749	421	139	10	76.83	18.11	4.65		156822470	+	NM_005494	DNAJB6
340	chr11	75203204	75203814	611	303	15	76.86	17.08	4.66		75203859	+	NM_003369	UVRAG
341	chr10	100238669	100239301	633	293	15	76.86	19.31	4.66		100196694	-	NM_182639	HPS1
342	chrX	53271284	53271860	577	167	15	76.84	12.71	4.66		53271329	-	NM_004187	JARID1C
343	chr13	43564218	43564667	450	230	14	76.86	11.44	4.66		43494470	+	NR_026955	LOC121838
344	chr2	198026624	198027301	678	314	14	76.86	17.23	4.66		198026475	+	NM_025147	COQ10B
345	chr8	29664463	29664871	409	187	12	76.98	13.07	4.7		29661544	-	NR_026765	C8orf75
346	chr13	37821618	37821999	382	127	10	76.38	18.3	4.73		37821941	+	NM_016617	UFM1
347	chr3	9379511	9379890	380	223	10	76.61	18.3	4.74		9379716	+	NM_015453	THUMPD3
348	chr12	50966708	50967235	528	168	11	76.62	13.58	4.75		50971566	-	NM_002281	KRT81
349	chr2	23411537	23412476	940	754	16	76.11	7.96	4.82		24003438	-	NM_017552	ATAD2B
350	chr11	74951315	74951740	426	209	10	76.22	15.82	4.83		74950817	+	NM_001235	SERPINH1
351	chr9	110437044	110437609	566	396	14	75.82	15.53	5.02		110658096	-	NM_006686	ACTL7B
352	chr6	170704177	170704626	450	164	11	75.48	16.95	5.1		170704342	-	NM_002793	PSMB1
353	chr10	12277848	12278503	656	246	12	75.55	22.64	5.11		12278149	-	NM_014142	NUDT5
354	chr16	3114427	3114837	411	247	10	74.98	16.95	5.15		3105600	-	NR_024166	MGC3771
355	chr9	121676462	121677173	712	172	14	75.08	10.52	5.16		121171560	-	NM_014618	DBC1
356	chr17	72635448	72635962	515	153	14	75.21	12.71	5.17		72648599	+	NM_003003	SEC14L1
357	chr1	112739796	112740563	768	376	13	75.11	15.47	5.17		112740322	+	NM_018704	CTTNBP2NL
358	chr1	30431869	30432395	527	302	15	75.25	11.3	5.18		30969019	-	NM_002379	MATN1
359	chr4	109760994	109761410	417	165	12	74.65	11.31	5.68		109761170	+	NM_000995	RPL34
360	chr9	94918167	94918689	523	136	12	74.65	14.18	5.68		94936391	-	NM_004148	NINJ1
361	chr2	85675875	85676475	601	360	12	74.65	18.33	5.7		85676347	+	NM_016494	RNF181
362	chr1	71319219	71319772	554	391	12	74.65	16.9	5.7		71319333	-	NM_005455	ZRANB2
363	chr1	97412246	97412765	520	354	12	74.65	15.86	5.7		96959762	+	NM_021190	PTBP2
364	chr8	33462127	33462568	442	166	10	74.71	20.38	5.76		33462226	+	NM_032509	MAK16
365	chr2	131528517	131529115	599	361	12	74.73	16.27	5.77		131567474	-	NM_001009993	FAM168B
366	chr1	161117743	161118019	277	139	10	74.48	11.69	5.88		161105229	-	NM_178550	C1orf110
367	chr17	18027282	18027599	318	160	9	74.46	20.38	6.03		18027591	+	NM_017758	ALKBH5
368	chr3	27501068	27501385	318	160	9	74.46	20.38	6.03		27473249	-	NM_003615	SLC4A7
369	chr1	89785886	89786214	329	165	9	74.46	20.38	6.03		89796859	+	NM_015350	LRRC8B
370	chr19	9556072	9556393	322	162	9	74.46	20.38	6.03		9556209	-	NM_001008727	ZNF121
371	chrX	48912612	48912910	299	150	8	74.46	18.11	6.03		48915216	+	NM_002668	PLP2
372	chr4	4300798	4301095	298	150	8	74.46	18.11	6.03		4300835	-	NM_032927	TMEM128
373	chr2	191454846	191455139	294	148	8	74.46	18.11	6.03		191453791	+	NM_014905	GLS
374	chr15	20475088	20475373	286	144	8	74.46	18.11	6.03		20444124	+	NM_014608	CYFIP1
375	chr7	6735616	6736044	429	198	10	74.39	17.45	6.11		6741460	+	NR_002217	PMS2CL
376	chr11	33751723	33752118	396	143	10	74.39	18.12	6.11		33752647	-	NM_033406	FBXO3
377	chr1	10809524	10810054	531	161	11	74.24	15.14	6.2		10779294	-	NM_017766	CASZ1
378	chr17	13913376	13913646	271	136	8	74.24	14.02	6.2		13913443	+	NM_001303	COX10
379	chr9	32999836	33000473	638	239	12	73.63	14.83	6.51		32991626	-	NM_175069	APTX
380	chr2	100801044	100801648	605	349	13	73.68	15.25	6.52		100803044	+	NM_002518	NPAS2
381	chr7	141084417	141085026	610	232	12	73.83	14.23	6.54		141084644	+	NM_003143	SSBP1
382	chr14	87498777	87499454	678	328	12	73.92	18.11	6.56		87529660	-	NM_001037525	GALC
383	chr3	113763283	113763840	558	299	11	74.05	18.11	6.59		113763584	+	NM_017945	SLC35A5
384	chr10	35334820	35335215	396	244	10	73.13	17.6	6.84		35419300	-	NM_003591	CUL2
385	chr20	60753831	60754399	569	162	11	73.14	22.64	6.85		60744241	+	NM_016354	SLCO4A1
386	chr14	38713842	38714527	686	255	12	73.33	18.11	6.88		38714137	+	NM_002687	PNN
387	chr4	74825069	74825415	347	156	9	73.39	17.68	6.9		74825138	+	NM_000584	IL8
388	chr11	111221925	111222307	383	227	10	72.94	16.95	7.52		111247214	-	NM_001077691	ALG9
389	chr10	98016654	98017276	623	358	16	72.93	10.17	7.62		98021323	-	NM_001114094	BLNK
390	chr5	179091727	179092325	599	167	14	72.67	14.12	7.64		179092456	+	NM_014757	MAML1
391	chr2	2089589	2090252	664	315	12	72.7	12.98	7.65		2302010	+	NR_024468	LOC730811
392	chr17	69903135	69903758	624	242	12	72.71	14.23	7.65		69875239	+	NM_181790	GPR142
393	chr2	206657354	206657816	463	133	10	72.71	15.85	7.66		206659151	-	NM_017759	INO80D
394	chrX	102102954	102103221	268	135	8	72.78	13.56	7.67		102078855	+	NM_001031834	RAB40AL
395	chr11	85690611	85691025	415	258	10	72.8	16.27	7.68		85690900	+	NR_024597	C11orf73
396	chr19	17238867	17239439	573	373	11	72.82	13.58	7.69		17239231	+	NM_001033549	C19orf62
397	chr7	107997203	107997565	363	225	9	72.55	18.11	7.71		107997403	-	NM_001130475	THAP5
398	chr3	107775191	107775550	360	168	9	72.88	18.11	7.71		107070577	-	NM_170662	CBLB
399	chr5	140024187	140024812	626	420	16	72.64	11.3	7.72		140024567	+	NM_017706	WDR55
400	chr1	14866152	14866728	577	260	11	72.5	15.85	7.88		14797799	+	NM_015209	KIAA1026
401	chr17	42433470	42433833	364	168	9	72.44	15.85	7.95		42411613	-	NM_203400	RPRML
402	chr11	63967621	63968198	578	410	11	72.42	15.85	8.14		63883200	+	NM_003942	RPS6KA4
403	chr12	73217608	73217973	366	198	9	72.22	18.11	8.28		73217817	+	NM_001136262	LOC552889
404	chr6	111409785	111410251	467	163	10	72.25	18.08	8.29		111409983	+	NM_032194	BXDC1
405	chr17	44940772	44941136	365	223	9	72.33	18.11	8.32		44927653	+	NM_002507	NGFR
406	chr12	14317860	14318652	793	500	16	72.17	11.29	8.46		14409877	+	NM_018179	ATF7IP
407	chr8	41465115	41465426	312	157	9	71.81	19.06	8.59		41467237	+	NM_016099	GOLGA7
408	chr6	26704840	26705410	571	165	11	71.87	19.89	8.6		26705158	+	NM_013375	ABT1
409	chr15	55131666	55132034	369	151	9	71.9	18.11	8.61		54998124	+	NM_207036	TCF12
410	chr20	23071730	23072103	374	157	10	71.63	14.27	8.62		23014977	-	NM_012072	CD93
411	chr2	174050461	174051089	629	366	14	71.64	10.17	8.63		173927806	+	NM_031942	CDCA7
412	chr3	39876599	39877180	582	318	11	72	13.56	8.63		39826306	+	NM_015460	MYRIP
413	chr17	74339993	74340707	715	172	16	71.72	8.9	8.64		74348564	-	NM_025090	USP36
414	chr14	50776530	50776965	436	153	11	72.05	11.86	8.64		50776635	+	NM_030755	TMX1
415	chr20	52176803	52177272	470	308	10	72.06	20.38	8.65		52223923	-	NM_000782	CYP24A1
416	chr7	117611114	117611483	370	152	9	71.79	18.11	8.65		117611321	+	NM_016200	LSM8
417	chr19	53640813	53641182	370	149	9	71.79	15.85	8.65		53640873	+	NM_031485	GRWD1
418	chr5	135114184	135114539	356	223	10	71.55	13.56	8.69		135198263	+	NM_145282	LOC153328
419	chr7	100047528	100048002	475	163	10	71.61	20.38	8.7		100047660	+	NM_001040097	MOSPD3
420	chr20	44322542	44323074	533	230	12	71.49	13.56	8.76		44313741	-	NM_021248	CDH22
421	chr21	36613958	36614433	476	358	10	71.52	20.38	8.77		36614356	+	NM_015358	MORC3
422	chr6	136652384	136652840	457	298	10	71.31	17.31	8.81		136652682	-	NM_138419	FAM54A
423	chr9	130257816	130258406	591	224	12	71.39	13.58	8.82		130258252	+	NM_002540	ODF2
424	chr2	217101986	217102414	429	172	10	71.37	14.23	8.82		217071764	+	NM_000998	RPL37A
425	chr1	11865807	11866283	477	308	10	71.43	20.38	8.83		11841579	-	NM_002521	NPPB
426	chr10	118036309	118036938	630	256	14	71.45	14.53	8.84		118023116	-	NM_005264	GFRA1
427	chr16	55042551	55042932	382	245	10	71.48	16.34	8.85		55042762	-	NM_007006	NUDT21
428	chr1	4088100	4088567	468	163	10	71.21	13.26	9.08		3806827	+	NR_024455	LOC100133612
429	chr1	159249516	159250671	1156	814	23	71.06	9.04	9.34		159257757	-	NM_016946	F11R
430	chr17	38403635	38404354	720	276	14	70.78	11.48	9.38		38403971	+	NM_000988	RPL27
431	chr2	43831492	43831989	498	150	11	70.78	11.3	9.39		43854685	+	NM_001012665	DYNC2LI1
432	chrX	153397887	153398202	316	159	9	70.99	18.68	9.43		153397567	-	NM_021806	FAM3A

## Sheet: legend
	HIGH CONFIDENCE - regions identified by MACS as significantly enriched in ELK1 signal (over the IgG and input controls) in both repeats, with FDR <10%
Column	Description
A	rank - arbitrarily chosen as number of tags
B	chr - chromosome number
C	start - start of region (as identified by MACS)
D	end - end of region (as identified by MACS)
E	ID - order number of region ac called by MACS for comparison of the eLK1 and IgG signals for repeat 2
F	length - length of region
G	summit - the point of each region with the strongest signal
H	tags - number of tags in each peak
I	fold enrichment - fold enrichment of ELK1 signal over the IgG control for repeat 2
J	(-)log10Pval
K	FDR (%) - percent chance that a given region is a false positive
M	TSS - position of the nearest transcription start site annotated in release 41 of the RefSeq database (available on 22/07/2010)
N	strand - strand on which the nearest gene is located
O	RefSeq ID - for multiple transcripts assigned to the same Official Gene Symbol, the variant whose transcription start site was closest to each region summit was considered
P	Gene Name - Official Gene Symbol (HUGO)
Q	distance - distance of region summit relative to the nearest transcription start site (negative values indicate thet the summit lies upstrem of the TSS)
R	GABPA - % coverage by regions from the GABPA ChIP-seq (Valouev A, Johnson DS, Sundquist A, Medina C, Anton E, Batzoglou S, Myers RM, Sidow A; Genome-wide analysis of transcription factor binding sites based on ChIP-Seq data; Nat Methods 5:829-34; Sep 2008)
S	SRF - % coverage by regions from the SRF ChIP-seq (Valouev A, Johnson DS, Sundquist A, Medina C, Anton E, Batzoglou S, Myers RM, Sidow A; Genome-wide analysis of transcription factor binding sites based on ChIP-Seq data; Nat Methods 5:829-34; Sep 2008)
T	ELK4 - % coverage by regions from the ELK4 ChIP-seq (O'Geen H, Lin YH, Xu X, Echipare L, Komashko VM, He D, Frietze S, Tanabe O, Shi L, Sartor MA, Engel JD, Farnham PJ; Genome-wide binding of the orphan nuclear receptor TR4 suggests its general role in fundamental biological processes; BMC Genomics 11:689; Dec 2010)
U	FC EvsG, t=0 - fold change of expression of the nearest annotated gene upon transfection with siELK1 (as compared to an siGAPDH-transfected control), at 0 min of EGF stimulation (if significant)
V	FC EvsG, t=30 - fold change of expression of the nearest annotated gene upon transfection with siELK1 (as compared to an siGAPDH-transfected control), at 30 min of EGF stimulation (if significant)
W	FC 30vs0, siGAPDH - fold change of expression of the nearest annotated gene after 30 min of EGF stimulation (compared to an unstimulated sample) in cells transfected with siGAPDH (if significant)
X	FC 30vs0, siGAPDH - fold change of expression of the nearest annotated gene at 0 min of EGF stimulation (compared to an unstimulated sample) in cells transfected with siELK1 (if significant)
	LOW CONFIDENCE - regions identified by MACS as significantly enriched in ELK1 signal (over the IgG and input controls) only in repeat 2, with FDR <10%
Column	Description
A	rank - arbitrarily chosen as number of tags
B	chr - chromosome number
C	start - start of region (as identified by MACS)
D	end - end of region (as identified by MACS)
E	length - length of region
F	summit - the point of each region with the strongest signal
G	tags - number of tags in each peak
H	fold enrichment - fold enrichment of ELK1 signal over the IgG control for repeat 2
I	(-)log10Pval
J	FDR (%) - percent chance that a given region is a false positive
K	TSS - position of the nearest transcription start site annotated in the Refseq database available on 22/07/2010
M	strand - strand on which the nearest gene is located
N	RefSeq ID - for multiple transcripts assigned to the same Official Gene Symbol, the variant whose transcription start site was closest to each region summit was considered
O	Gene Name - Official Gene Symbol (HUGO)
